1           **Thyroglobulin Interactome Profiling Uncovers Molecular Mechanisms of**  
2                           **Thyroid Dysmorphogenesis**

3  
4                           Madison T. Wright<sup>1</sup>, Logan Kouba<sup>2</sup>, Lars Plate<sup>1,2,\*</sup>

5  
6                           <sup>1</sup>Department of Chemistry, Vanderbilt University, Nashville, TN

7                           <sup>2</sup>Department of Biological Sciences, Vanderbilt University, Nashville, TN

8  
9                           \*Corresponding author: [lars.plate@vanderbilt.edu](mailto:lars.plate@vanderbilt.edu)

10  
11                          Running Title: Thyroglobulin interactome profiling

12  
13

14 **ABSTRACT**

15

16 Thyroglobulin (Tg) is a secreted iodoglycoprotein serving as the precursor for T3 and T4  
17 hormones. Many characterized Tg gene mutations produce secretion-defective variants  
18 resulting in congenital hypothyroidism (CH). Tg processing and secretion is controlled  
19 by extensive interactions with chaperone, trafficking, and degradation factors compris-  
20 ing the secretory proteostasis network. While dependencies on individual proteostasis  
21 network components are known, the integration of proteostasis pathways mediating Tg  
22 protein quality control and the molecular basis of mutant Tg misprocessing remain  
23 poorly understood. We employ a multiplexed quantitative affinity purification–mass  
24 spectrometry approach to define the Tg proteostasis interactome and changes between  
25 WT and several CH-variants. Mutant Tg processing is associated with common imbal-  
26 ances in proteostasis engagement including increased chaperoning, oxidative folding,  
27 and routing towards ER-associated degradation components, yet variants are ineffi-  
28 ciently degraded. Furthermore, we reveal mutation-specific changes in engagement  
29 with N-glycosylation components, suggesting distinct requirements for one Tg variant on  
30 dual engagement of both oligosaccharyltransferase complex isoforms for degradation.  
31 Modulating dysregulated proteostasis components and pathways may serve as a thera-  
32 peutic strategy to restore Tg secretion and thyroid hormone biosynthesis.

33

34 Keywords: affinity purification–mass spectrometry, congenital hypothyroidism, interac-  
35 tomics, proteostasis, thyroglobulin

## 36 INTRODUCTION

37

38 Thyroid hormone biosynthesis is an intricate and multifaceted process involving a  
39 sequence of biochemical reactions (Carvalho & Dupuy, 2017; Dai *et al*, 1996; Fayadat  
40 *et al*, 1999; Di Jeso & Arvan, 2016). Triiodothyronine (T3) and thyroxine (T4) hormones  
41 are necessary for normal growth and development in utero and early childhood, and go  
42 on to regulate primary metabolism in adulthood (Citterio *et al*, 2019; Oetting & Yen,  
43 2007). Hypothyroidism and dysmorphogenesis stemming from mutations or damage to  
44 the biosynthetic components ultimately results in decreased or complete loss in produc-  
45 tion of T3 and T4. Congenital hypothyroidism (CH) affects approximately 1:2000 to  
46 1:4000 newborns, and if not detected and addressed can lead to severe and permanent  
47 neurological damage, including mental retardation (Chaker *et al*, 2017; Rose *et al*,  
48 2006). A critical gene involved in thyroid hormone biogenesis and CH pathology is thy-  
49 roglobulin (Tg) encoding the prohormone precursor protein for T3 and T4 (Fig 1A).  
50 There are 176 documented Tg mutations that impair proper production, folding, or pro-  
51 cessing leading to dysmorphogenesis (Citterio *et al*, 2019). Missense mutations result-  
52 ing in full-length but folding-incompetent Tg disrupt normal protein homeostasis (proteo-  
53 stasis) and lead to decreased or complete loss of Tg protein secretion into the thyroid  
54 follicular lumen, a key step in hormone production. Instead, mutant Tg variants accumu-  
55 late within the endoplasmic reticulum (ER) of thyroid follicular cells and are ultimately  
56 degraded (Kim *et al*, 1996).

57 While many CH-associated folding-incompetent Tg mutations have been docu-  
58 mented, the molecular mechanisms of Tg folding and processing controlled by the pro-  
59 teostasis network (PN), consisting of chaperones, co-chaperones, folding enzymes, traf-  
60 ficking factors, and degradation factors, remain incompletely understood. Coordination  
61 of these PN components ensures the proper folding, trafficking, and degradation of cli-  
62 ents such as Tg through a process cumulatively referred to as protein quality control  
63 (PQC) (Hartl *et al*, 2011; Balchin *et al*, 2016; Sun & Brodsky, 2019). Previous studies  
64 have shown that CH-associated Tg mutants exhibit increased interactions with individ-  
65 ual PN components including BiP, GRP94, PDIA3, CANX, and CALR, that aid in folding

66 and processing (Menon *et al*, 2007; Baryshev *et al*, 2004; Park & Arvan, 2004;  
67 Hishinuma, 1999; Muresan & Arvan, 1997; Di Jeso *et al*, 2005; Kim & Arvan, 1993).  
68 Nonetheless, it remains unclear which of these components are responsible for the im-  
69 proper processing of mutant Tg. The current collection of known interactors, identified  
70 through traditional immunoprecipitation and immunoblotting strategies, is likely limited  
71 as these methods are not conducive to discovery-based investigations. Additionally, lit-  
72 tle work has focused on characterizing mutation specific changes in PN engagement.  
73 Identifying the complete Tg interactome and defining the molecular mechanisms of al-  
74 tered PN engagement for mutant Tg variants may reveal areas of PQC that can be tar-  
75 geted therapeutically to rescue the secretion of these CH-associated variants. No dis-  
76 ease modifying therapies currently exist to restore secretion of destabilized Tg, but de-  
77 vising such strategies would be particularly critical considering the increased prevalence  
78 of dysmorphogenesis amongst newborns and complications arising from the current  
79 “gold standard” of hormone therapy treatments in the clinic (Olivieri *et al*, 2015; Chaker  
80 *et al*, 2017). Modulation of individual PN components or entire pathways has shown re-  
81 cent promise as a potential therapeutic strategy to combat a number of protein folding  
82 diseases, including light-chain amyloidosis (AL), transthyretin (TTR) amyloidosis, and  
83 polyglutamine (polyQ) associated neuropathies (Plate & Wiseman, 2017; Hetz *et al*,  
84 2019; Cooley *et al*, 2014; Chen *et al*, 2014). Such therapies could be similarly effective  
85 at restoring Tg secretion and subsequent hormone biosynthesis.

86 Here, we present a quantitative interactome proteomics method that allowed us  
87 to globally profile several CH-associated mutant Tg variants. Unlike previous proteosta-  
88 sis interactome studies (Pankow *et al*, 2015; Plate *et al*, 2019; Doan *et al*, 2019), the  
89 multiplexing capabilities used here enable a head-to-head comparative analysis of five  
90 distinct protein variants at once. While chaperone complexes and client recognition for  
91 select chaperones have been mapped (Taipale *et al*, 2014; Behnke *et al*, 2016;  
92 Christianson *et al*, 2012), system-wide investigations into PN processing of individual  
93 client proteins are lacking. The current study describes the identification of a compre-  
94 hensive PN interactome for WT Tg and several secretion deficient mutant variants.  
95 Comparison of the PN interactome for the CH-associated mutant variants to WT Tg

96 allowed us to gain mechanistic insights into shared protein quality control defects that  
97 are responsible for the loss of secretion of all destabilized variants. Our data supports a  
98 model whereby the destabilized Tg variants are retained intracellularly through in-  
99 creased interactions with chaperoning and oxidative protein folding pathway compo-  
100 nents. We also find evidence that Tg mutants are increasingly routed towards ER-asso-  
101 ciated degradation (ERAD), but degradation cannot be completed due to failures in re-  
102 trotranslocation, retention by ER chaperone networks, or overall lower engagement of  
103 proteasomal degradation machinery. At the same time, we find mutation specific in-  
104 teractome remodeling with components of N-glycosylation, downstream glycan pro-  
105 cessing, and lectin-assisted protein folding components. Mutant-specific interaction  
106 changes suggest that such Tg variants have distinct imbalances associated with their  
107 aberrant folding and processing within the ER, leading to the loss of secretion.

108

109

## 110 **RESULTS**

111

### 112 **Distinct Thyroglobulin Mutants Present Common Secretion Defects**

113

114 Tg is a large 330 kDa multidomain protein consisting of extensive cysteine-rich  
115 repeat regions and a C-terminal cholinesterase like domain (ChEL) (Fig. 1B & Fig. S1A)  
116 (Coscia *et al*, 2020). We focused on a set of single-point mutations that lead to impaired  
117 Tg secretion in human CH patients (A2234D and C1264R) and in a mouse model of  
118 thyroid hormone deficiency and goiter (L2284P) (Kim *et al*, 1998; Caputo *et al*, 2007;  
119 Hishinuma, 1999). A2234D and L2284P occur in the ChEL domain, which serves as an  
120 intramolecular chaperone playing a critical role in Tg folding, dimerization, and secretion  
121 (Lee *et al*, 2008, 2009). Our analysis also included a previously uncharacterized ChEL  
122 mutation at a conserved glycine (G2341R), which is located adjacent to L2284 and  
123 A2234. We contrasted the ChEL mutations to the C1264R variant in the hinge/flap re-  
124 gion (Fig. S1A-D).

125 We transiently transfected HEK293T cells with FLAG-tagged expression con-  
126 structs of either WT or the respective mutant Tg variants. We detected all Tg variants at  
127 similar levels in lysate samples, while only WT Tg was detected in the media, confirming  
128 the secretion defect of CH mutations (Fig. 1C). C1264R Tg was occasionally detected  
129 at trace amounts in the media indicating low residual secretion (< 1-2% of WT). These  
130 results are in accordance with previous Tg studies (Pardo *et al*, 2009; Lee *et al*, 2011;  
131 Hishinuma, 1999; Kim *et al*, 1998). WT Tg undergoes extensive glycosylation within the  
132 ER prior to being trafficked and further modified in the Golgi apparatus, while the fold-  
133 ing-incompetent CH-associated mutations are trapped within the ER preventing Golgi  
134 modifications. To investigate Tg localization and glycosylation state we performed En-  
135 doH digestions on the transfected HEK293T lysates. All mutants were EndoH sensitive,  
136 indicating they had not traversed the medial Golgi apparatus as EndoH specifically  
137 cleaves ER associated high-mannose glycans. In contrast, WT Tg separated into two  
138 distinct EndoH resistant and EndoH sensitive populations indicating that WT Tg was  
139 able to fold within the ER and traverse the secretory pathway (Fig. 1D-E). These data  
140 further confirm that the C-terminal FLAG epitope tag does not influence Tg glycosyla-  
141 tion. Overall, our results confirm that FLAG epitope tagged Tg constructs do not show  
142 altered processing and serve as a useful model system to probe PQC dynamics for WT  
143 and CH-associated, secretion-deficient Tg mutants.

144

## 145 **Defining the Tg Proteostasis Interactome**

146

147 To identify protein-protein interactions potentially responsible for the aberrant  
148 processing of CH-associated mutations, we implemented an affinity purification – mass  
149 spectrometry (AP-MS) method coupled with tandem-mass-tag (TMT) labeling to allow  
150 for multiplexed identification and quantification of interacting proteins (Fig. 2A) (Plate *et*  
151 *al*, 2019). Transient interactions between Tg and PN components were captured using  
152 the cell-permeable cross-linker dithiobis(succinimidyl propionate) (DSP). We first sought  
153 to define the interactomes for WT Tg and each of the mutant variants (G2341R,  
154 L2284P, A2234D, and C1264R). We employed a mock AP using transfection of an

155 untagged WT Tg control construct, or fluorescent proteins (EGFP or tdTomato) to delin-  
156 eate high confidence interactors from background proteins (Fig. 2A). We further opti-  
157 mized normalization methods and cutoffs to confidently identify interactors pertaining to  
158 protein folding, trafficking, and secretion likely to play a role in Tg processing (Fig. S2A-  
159 B and Table S1) (Keilhauer *et al*, 2015; Chen *et al*, 2013). We identified interacting pro-  
160 teins for each individual Tg construct (Fig. S2C) and defined a cumulative list of 188  
161 confidently identified interactors across all Tg constructs (Tables S2-3), we defined this  
162 list as the Tg interactome and focused on these proteins for subsequent analyses (Fig.  
163 2B and Table S4). Using gene ontology (GO) enrichment analysis, 67% of the Tg in-  
164 teractome was enriched in components belonging to PQC within the secretory pathway  
165 (Fig 2C and Tables S3 and 5), including Hsp70/40 and Hsp90 chaperones and co-chap-  
166 erones, N-glycosylation machinery, components involved in disulfide bond formation,  
167 ER-associated degradation (ERAD), as well as lysosomal and Golgi localized proteins  
168 (Chen *et al*, 2013).

169 The Tg interactome identified here greatly expands the limited list of previously  
170 identified interactors. Importantly, our dataset also confirms previously known binding  
171 partners, such as GRP94, BiP, PDIA3, CANX, and CALR (Kim & Arvan, 1995; Menon *et*  
172 *al*, 2007). We were able to identify additional ER Hsp40 co-chaperones, including  
173 DNAJC3, DNAJB11, and DNAJC10, that can bind Tg directly and coordinate with the  
174 ER Hsp70 chaperone BiP to influence quality control decisions (Pobre *et al*, 2019;  
175 Behnke *et al*, 2016). Our data set is also rich in PN components involved in disulfide  
176 processing and formation. This enrichment is consistent with a strong dependence on  
177 oxidative folding pathways with Tg containing 122 cysteine residues and 61 disulfide  
178 bonds (Coscia *et al*, 2020). Only PDIA1/PDI, PDIA3/ERp57, PDIA4/ERp72,  
179 PDIA6/ERp5 and PDIA9/ERp29 were previously known to associate with Tg (Di Jeso *et*  
180 *al*, 2014; Baryshev *et al*, 2004; Menon *et al*, 2007), but our dataset additionally identified  
181 PDIA10/ERp44, TXNDC5/ERp46, and TMX1, among others (Figure 2B). ERAD associ-  
182 ated factors, OS-9, EDEM3, SEL1L, which have been presumed to interact with Tg but  
183 not confirmed (Di Jeso & Arvan, 2016), along with new factors such as FOXRED2, and  
184 lysosomal components were also identified. The identification of lysosomal components

185 suggest that autophagy may play a role in the degradation of some Tg constructs. Addi-  
186 tionally, we detected previously known and novel interactors involved in glycoprotein  
187 folding and processing such as GANAB, LMAN1, UGGT1, as well as other lectins and  
188 glycan modifying enzymes. Overall, our analysis validated 28 previously identified Tg  
189 interactors and described 160 new PN interactions (Fig. 2D and Table S3).

190

## 191 **The Secretion Defect of Tg Mutants is Associated with Common Increases in Pro-** 192 **teostasis Interactions**

193

194 Next, we quantified interaction fold changes for the specific mutants relative to  
195 WT Tg to determine what factors may govern the aberrant PQC processing and secre-  
196 tion defects (Fig. 3A-B, Table S6, and Fig. S3A). Remarkably, when comparing CH-as-  
197 sociated mutant interactomes with that of WT, many of the quantified interaction  
198 changes were similar across all CH-associated mutants. This held true particularly for  
199 factors involved in Hsp70/40 or Hsp90 assisted protein folding, including the Hsp70 and  
200 Hsp90 chaperones BiP and GRP94 along with co-chaperones DNAJB11 and  
201 DNAJC10. We observed similar increases with disulfide/redox-processing enzymes  
202 such as protein disulfide isomerases PDIA3, PDIA4, and PDIA6. We validated in-  
203 creased interactions between mutant Tg variants and GRP94, BiP, PDIA4, PDIA6,  
204 DNAJC10 by Co-AP followed by quantitative Western blot (Fig. S3B-C).

205 Additionally, the enzymes responsible for marking and trafficking ER clients for  
206 ERAD including EDEM3, FOXRED2, OS9, and SEL1L all showed consistently in-  
207 creased interactions with Tg mutants compared to WT (Fig. 4A-D) (Christianson *et al*,  
208 2008; Tang *et al*, 2014; Hirao *et al*, 2006; Bernasconi *et al*, 2008). This observation  
209 prompted us to test whether the CH-associated mutant Tg variants are instead de-  
210 graded at a higher rate. To monitor potential changes in degradation rates of the Tg  
211 constructs we employed a cycloheximide (CHX) chase assay (Fig. S4A). Approximately  
212 one third of WT Tg was secreted after 4 hours (Fig. 4E and Fig. S4B). As previously  
213 noted, none of the CH-associated Tg mutants were secreted. When monitoring Tg deg-  
214 radation, all constructs showed similar rates of degradation on the scale of 30 - 40%



215 after 4 hours of CHX treatment (Fig. 4E and Fig. S4B). This degradation rate is con-  
216 sistent with prior studies (Tokunaga *et al*, 2000) and indicated that despite increased  
217 targeting of mutant Tg towards ERAD, the degradation rates are unaffected. To investi-  
218 gate why degradation rates are unchanged for the mutant variants, we next looked at  
219 downstream proteostasis factors involved in ERAD after retrotranslocation of proteins  
220 into the cytosol. We detected Tg interactions with VCP/p97, the ATPase involved in ex-  
221 tracting substrates from the ER, as well as several subunits of the proteasome (Fig.  
222 4A,F). Interactions between Tg mutant variants and VCP are mostly unchanged relative  
223 to WT, and proteasome subunits were consistently decreased for all mutants. Together,  
224 these results suggest that, while CH-associated Tg mutants are recognized and pro-  
225 cessed for ERAD, the proteins may not be properly retrotranslocated for subsequent  
226 proteasomal degradation.

227 Overall, the interactomics data suggest that CH-associated mutant Tg display  
228 common PQC defects linked to prolonged chaperoning facilitated largely by Hsp70/40,  
229 Hsp90, and disulfide/redox folding pathways, as well as increased associations with ER  
230 luminal ERAD components. Interestingly, in many cases interaction fold changes were  
231 slightly higher for all ChEL domain Tg mutants, G2341R, L2284P, and A2234D than for  
232 the C1264R mutant occurring in the hinge/flap region. This parallels our and previous  
233 secretion data exhibiting residual C1264R-Tg secretion (Lee *et al*, 2011) and suggest  
234 that the Tg PQC defects are more profound when mutations occur in the ChEL domain  
235 (Fig. 3B, Table S6, and Fig. S1A-C).

236

## 237 **Tg Mutants Show Distinct Changes in Engagement with N-linked Glycosylation** 238 **Pathways**

239

240 While common changes in PN interactions across CH-associated mutants pro-  
241 vide new insights on conserved Tg processing mechanisms, we wanted to further ex-  
242 plore the data to investigate whether any mutation-specific PN interaction changes oc-  
243 curred that may define unique PQC defects associated with each mutation. We de-  
244 tected subtle, yet striking deviations across CH-associated Tg interactions with PN

245 components involved in N-glycosylation and lectin folding (Fig. 5A-E). The membrane  
246 bound lectin calnexin (CANX) showed modestly increased interactions with G2341R  
247 and L2284P variants, yet decreased interactions in the case of C1264R and A2234D.  
248 Intriguingly, interactions with calreticulin (CALR), the soluble paralog of CANX, were  
249 also more strongly increased for the G2341R and L2284P variants, along with PDIA3,  
250 which has been shown to specifically bind both CANX or CALR in complex (Kozlov *et*  
251 *al*, 2006; Lamriben *et al*, 2016) (Fig. 5B). The glucosyltransferases UGGT1 and UGGT2  
252 showed similarly divergent interaction changes (Fig. 5C). In the case of UGGT2, all mu-  
253 tations in the ChEL domain exhibited increased interactions while C1264R showed  
254 modestly decreased interactions. Yet, UGGT1 interactions across all mutations were in-  
255 creased. In line with this observation was the increased interactions across all mutations  
256 with GANAB, the catalytic subunit of the heterodimeric ER glucosidase II complex re-  
257 sponsible for sequentially cleaving the two innermost glucose residues of the ER asso-  
258 ciated N-linked high-mannose oligosaccharide precursor – a necessary process re-  
259 quired for client proteins to properly enter the CANX/CALR lectin folding pathway (Fig.  
260 5D) (Martiniuk *et al*, 1985; Lamriben *et al*, 2016). While these findings revealed some  
261 unique mutation specific changes, all of these interactions occur downstream of N-gly-  
262 cosylation by the oligosaccharyltransferase (OST) complex, prompting us to compare  
263 potential interaction changes with the OST complex (Braunger *et al*, 2018). We noticed  
264 mutation specific changes in engagement with the two different OST isoforms. In one  
265 isoform containing the catalytic STT3A subunit, the OST is largely associated with the  
266 translocon channel and facilitates co-translational glycosylation of ER client proteins  
267 (Ruiz-Canada *et al*, 2009). Most CH-associated Tg mutants showed modestly de-  
268 creased interactions with the STT3A catalytic subunit relative to WT (Fig. 5E). The other  
269 OST isoform containing STT3B is largely associated with post-translational glycosyla-  
270 tion of ER client proteins (Ruiz-Canada *et al*, 2009). Here, G2341R and L2284P exhib-  
271 ited modestly increased or unchanged interactions with STT3B while A2234D and  
272 C1264R showed decreased interaction (Fig. 5E). We confirmed by Co-AP and Western  
273 blot that A2234D and C1264R displayed decreased interactions with STT3B compared  
274 to WT and that these changes were distinct from G2341R and L2284P (Fig. S4C).

275 Overall, our findings reveal distinct PQC defects for the different CH-associated Tg mu-  
276 tants and their engagement with the OST complex and downstream processing through  
277 the CANX/CALR lectin folding pathway (Lamriben *et al*, 2016).

278

## 279 **Perturbation of N-linked Glycosylation Distinctly Impacts Tg Mutants**

280

281 The OST complex is most upstream in the N-glycosylation and lectin folding  
282 pathway (Fig 5A). Therefore, we chose to focus on elucidating the role of the two differ-  
283 ent STT3A and STT3B dependent OST isoforms on downstream Tg processing. To as-  
284 sess the functional implications of these changes with OST engagement identified in our  
285 dataset, we monitored the effects of isoform-specific knockouts of STT3A or STT3B N-  
286 glycosylation machinery on Tg secretion and degradation (Kelleher *et al*, 2003; Ruiz-  
287 Canada *et al*, 2009; Cherepanova & Gilmore, 2016). We transfected Tg variants into  
288 HEK293T STT3A<sup>-/-</sup> and STT3B<sup>-/-</sup> knockout cell lines and followed Tg processing via cy-  
289 cloheximide (CHX) chase assay and <sup>35</sup>S pulse-chase labeling (Fig. S4A,D). Knockout of  
290 either OST subunit did not abolish WT Tg secretion nor rescue secretion of any CH mu-  
291 tants (Fig. 5F, S4E). On the other hand, small decreases in secretion for WT Tg oc-  
292 curred in the STT3A and STT3B KO cells when measured via CHX assay (Fig. S4F-G).  
293 We then went on to quantify degradation rates for WT Tg and the CH-associated mu-  
294 tants (Fig. S5F,H). For all Tg constructs, degradation rates were not significantly  
295 changed in the STT3A or STT3B KO cells compared to the parental cells, yet we no-  
296 ticed a small, but variable, increase in degradation for G2341R in the presence of either  
297 STT3A or STT3B KO and a small, but insignificant, attenuation of degradation of  
298 A2234D in STT3A knockout cells. Given the high variability in degradation measure-  
299 ments using the CHX chase assay, we employed the <sup>35</sup>S pulse-chase labeling scheme  
300 to mitigate any complications resulting from inhibiting protein synthesis. Using the <sup>35</sup>S  
301 assay, STT3A and STT3B KO cells resulted in significantly reduced degradation rates  
302 for A2234D Tg, from 50% to 20% degraded after 4 hours (Fig 5G, Fig. S4I). Further-  
303 more, STT3A and STT3B KOs did not significantly alter WT Tg degradation (Fig. S4J-  
304 K). These results suggest that in the case of A2234D, engagement with both OST

305 isoforms is necessary for proper entry into the CANX/CALR lectin cycle and degradation  
306 initiated by glycoprotein quality control within the ER.

307

## 308 **DISCUSSION**

309

310 Most CH-associated Tg missense mutant variants present with very similar phe-  
311 notypes resulting in inefficient trafficking and loss of secretion. The majority of these CH  
312 mutant variants have been reported to be retained within the ER, interact with canonical  
313 PN components, and induce the unfolded protein response (UPR), which acts to adjust  
314 ER quality control capacity in response to ER stress (Baryshev *et al*, 2004; Plate &  
315 Wiseman, 2017). However, there has been little investigation into 1) identifying molecu-  
316 lar mechanisms involved in the inefficient folding and trafficking of these mutant pro-  
317 teins, and 2) developing or exploring therapeutic avenues aimed at rescuing the secre-  
318 tion and subsequent hormone production from these mutants (Kanou *et al*, 2007;  
319 Caputo *et al*, 2007; Pardo *et al*, 2009; Hishinuma, 1999; Baryshev *et al*, 2004; Menon *et*  
320 *al*, 2007; Kim *et al*, 1996). Here we utilized a multiplexed quantitative interactomics plat-  
321 form to describe the PN dependencies of several CH-associated Tg variants with muta-  
322 tions clustering in two different domains of Tg. Our analysis of Tg interactomes reveals  
323 common PQC defects that are involved in the loss of Tg secretion, but we also identify  
324 unique dependencies that may suggest PQC mechanisms that are specific to individual  
325 mutations.

326 Using the quantitative interactomics profiling method, we were able to identify  
327 previously documented Tg interactors such as BiP, GRP94, CANX, CALR, and PDIA3,  
328 but also greatly expand our knowledge of additional cochaperones, lectins, trafficking  
329 and degradation factors that influence PQC activity and subsequent Tg processing. Pre-  
330 vious work has provided insights on the implications of some of these interactions as  
331 BiP overexpression decreases WT Tg secretion (Muresan & Arvan, 1998). The iterative  
332 binding cycles between Tg with BiP and co-chaperones likely results in overall in-  
333 creased retention of Tg and therefore blocks partitioning of Tg to necessary trafficking  
334 components (Awad *et al*, 2008). Additionally, our analysis identified a number of Hsp40

335 co-chaperones, which can direct chaperone pathways to assume pro-folding or pro-deg-  
336 radation roles (Behnke *et al*, 2016; Oikonomou & Hendershot, 2020). PDIA4 has also  
337 been identified as a key interactor as it has been shown to bind mutant Tg and form co-  
338 aggregates retained within the ER (Menon *et al*, 2007). We identified increased interac-  
339 tion between PDIA4 and all secretion-deficient Tg mutants in this study, but we also  
340 identified stronger engagement with many other protein disulfide isomerase protein fam-  
341 ily members and factors involved in oxidative protein folding. Several PDI family mem-  
342 bers were already previously shown to form transient mixed-disulfide-linked intermedi-  
343 ates with Tg highlighting their involvement in Tg folding (Di Jeso *et al*, 2014; Baryshev  
344 *et al*, 2004; Menon *et al*, 2007). The increased interactions with these PDIs and addi-  
345 tional factors involved in disulfide bond formation may be responsible for intracellular re-  
346 tention and co-aggregation with destabilized Tg variants, which may be mediated  
347 through non-resolved mixed-disulfide bond intermediates (Kim *et al*, 1993; Menon *et al*,  
348 2007).

349 Our results show that the CH-associated Tg mutants not only engage many of  
350 the chaperoning and oxidative protein folding pathways to a greater extent, but also  
351 suggest altered interactions with ERAD and N-glycosylation components that may be  
352 responsible for the retention or aggregation within the ER. Prior work has shown that  
353 ERAD of Tg is suppressed upon the inhibition of mannosidase I (MAN1B1) (Tokunaga  
354 *et al*, 2000). MAN1B1 is known to trim the outermost alpha-1,2-linked mannose residue  
355 of the high-mannose ER-associated glycan, followed by subsequent trimming of inner  
356 mannose residues, a key step within the glycoprotein ERAD process (Avezov *et al*,  
357 2008). While we did not identify MAN1B1 in our dataset, other mannosidases of the ER  
358 degradation enhancing alpha-mannosidase like (EDEM) family associated with ER  
359 stress and UPR activation were identified in the current study (Molinari *et al*, 2003; Oda  
360 *et al*, 2003). These factors exhibited predominantly increased interactions with CH-as-  
361 sociated mutants relative to WT Tg, along with accessory proteins such as SEL1L,  
362 FOXRED2, OS-9, and other vital glycoprotein ERAD components (Christianson *et al*,  
363 2008; Bernasconi *et al*, 2008; Christianson *et al*, 2012). This increased engagement  
364 with ERAD targeting factors seemed paradoxical considering that mutant Tg variants

365 were not degraded to a greater extent than WT Tg. However, the mutant Tg variants  
366 may be recognized as destabilized and targeted for ERAD, but not efficiently retrotrans-  
367 located or recognized by the proteasome to initiate degradation (Nakatsukasa *et al*,  
368 2013). In support of this model, we observed decreased interactions between Tg mutant  
369 variants and several subunits of the proteasome. Instead, any of the above-mentioned  
370 chaperone/PDI-mediated retention or co-aggregation mechanisms could compete with  
371 retrotranslocation and degradation. It has been shown that protein aggregation propen-  
372 sity and ERAD targeting are tightly linked (Sun & Brodsky, 2018). Ultimately, Tg must  
373 be degraded as indicated by prior work and from our CHX and pulse-chase experi-  
374 ments, likely through residual ERAD activity and also autophagy (Menon *et al*, 2007;  
375 Tokunaga *et al*, 2000). Consistent with this, we identified a number of lysosomal protein  
376 factors (Fig. 2D and Fig. S5). Consequently, further investigations into the degradation  
377 components and pathways facilitating Tg degradation would be of interest to examine,  
378 particularly cross talk and timing between ERAD and ER-phagy (Schuck *et al*, 2014;  
379 Pohl & Dikic, 2019; Carvalho *et al*, 2006; Oikonomou & Hendershot, 2020; Sun &  
380 Brodsky, 2019).

381         The identification of altered interactions between CH-associated Tg variants and  
382 the components of the OST complex involved in protein N-glycosylation provides new  
383 insights into the distinct misprocessing defects for individual CH-associated Tg mutants.  
384 While the disruptions in OST complex interactions do not completely explain why these  
385 Tg mutants are unable to exit the ER, these changes occur for the most upstream en-  
386 zymes mediating Tg post-translational processing suggesting an important effect. Im-  
387 portantly, subtle changes in glycosylation patterns could have profound influences on  
388 binding of lectin-chaperones, glycan processing enzymes, or lectin-associated oxidore-  
389 ductases (Hammond *et al*, 1994; Kozlov *et al*, 2006; Martiniuk *et al*, 1985; Lamriben *et*  
390 *al*, 2016).

391         The changes in PN engagement could be a consequence of changes in Tg sec-  
392 ondary and tertiary structure of folding intermediates that then lead to altered engage-  
393 ment with the OST complex. Changes in secondary structure have been loosely pre-  
394 dicted for some Tg mutants including extension or reduced stretch of  $\alpha$ -helix or  $\beta$ -sheet

395 structure, along with the formation of a  $\beta$ -sheet (Pardo *et al*, 2008). Interestingly, the re-  
396 cent Cryo-EM structure of Tg showed that the three mutations, A2234D, L2284P, and  
397 G2341R cluster into a small region of the ChEL domain, suggesting that all three muta-  
398 tions could destabilize the structure at a similar location (Fig. S1B). Despite this co-lo-  
399 calization, the ChEL mutants displayed several distinct interactome changes and only  
400 A2234D could be rescued from degradation by knockout of individual OST isoforms.  
401 The same cryo-EM structure also revealed that a glycosylation site at N2013 may play a  
402 key role in stabilizing the Tg dimer (Coscia *et al*, 2020). Investigations into which OST  
403 complex is responsible for N2013 glycosylation and how these ChEL domain mutations  
404 may change the glycan occupancy would be of particular interest. On the other hand,  
405 the C1264R mutation is localized distantly from the ChEL domain in the hinge/flap re-  
406 gion, presumably disrupting a local disulfide bond with C1245 and resulting in structur-  
407 ally distinct folding defects (Fig. S1D). Nonetheless, interaction changes with the PN for  
408 C1264R are largely similar to the ChEL domain mutants, albeit to a lower magnitude,  
409 highlighting that mutations in distinct regions of the protein can produce common PQC  
410 deficiency that result in loss of protein secretion. Additionally, disulfide bond formation  
411 and N-glycosylation are competing reactions within the ER, further complicating Tg pro-  
412 cessing (Allen *et al*, 1995).

413 While PQC pathways are unable to facilitate complete folding and secretion of  
414 the Tg mutants, folding and processing is clearly attempted prior to timely degradation  
415 taking place. It may be the case for A2234D Tg that in the absence of either STT3A or  
416 STT3B in the KO cells, proper entry into the CANX/CALR cycle is disrupted, ultimately  
417 leading to retention within the ER and decreased degradation. The decreased degrada-  
418 tion rate may stem from an inability of the PN to recognize A2234D Tg for glycoprotein  
419 ERAD due to aberrant glycosylation, or aberrant glycosylation may lead to the preferen-  
420 tial aggregation of A2234D Tg, allowing it to escape ERAD (Lamriben *et al*, 2016;  
421 Oikonomou & Hendershot, 2020). Paradoxically, the other three mutant Tg variants  
422 studied here do not exhibit as stark a dependency on the presence of both OST  
423 isoforms for efficient degradation, although these mutants also displayed altered en-  
424 gagement with OST components in the interactomics dataset and two of the studied

425 mutations fall into the same structural region of the ChEL domain as A2234D. Overall,  
426 our results highlight that altered proteostasis interactions with Tg variants can have sub-  
427 tle, yet significant functional outcomes that are highly specific to localization and nature  
428 of the destabilizing mutation. The cryo-EM structure of human Tg and future structural  
429 studies on mutant Tg variants could enable further insights into what structural changes  
430 influence the engagement of proteostasis factors (Coscia *et al*, 2020).

431 The modulation of PN components or entire pathways has shown recent promise  
432 as a therapeutic strategy to combat a number of protein folding diseases (Plate &  
433 Wiseman, 2017; Hetz *et al*, 2019; Ryno *et al*, 2014; Plate *et al*, 2016; Chen *et al*, 2014).  
434 By using quantitative multiplexed interactome proteomics we identified specific PN com-  
435 ponents that may act as therapeutic targets for rescuing Tg secretion. A similar method  
436 has been used to investigate the molecular basis of activating transcription factor 6  
437 (ATF6) dependent regulation of immunoglobulin light chain secretion in (AL) amyloido-  
438 sis (Plate *et al*, 2019). Methods to pharmacologically target the UPR may be further ap-  
439 plicable to rescuing Tg secretion. Many of the CH-associated mutations presented here  
440 naturally activate the UPR (Caputo *et al*, 2007; Baryshev *et al*, 2004; Kim *et al*, 1996).  
441 Therefore, pharmacologic modulation of UPR activity to regulate the abundance of ER  
442 proteostasis factors in a coordinated manner may potentially act to restore mutant Tg  
443 secretion. In the case of amyloidogenic light chain proteins, overexpression of UPR-reg-  
444 ulated chaperones, in particular BiP and GRP94, was able reduce the secretion of an  
445 aggregation-prone protein variant (Cooley *et al*, 2014; Plate *et al*, 2019). Similar effects  
446 were also observed for a model aggregation-prone polyQ protein as cytosolic heat  
447 shock activation attenuated intracellular aggregation, and cellular toxicity (Ryno *et al*,  
448 2014). In contrast, the increased surveillance of destabilized Tg variants by chaperoning  
449 and oxidative folding pathways are likely directly implicated in the loss of protein secre-  
450 tion. Here, UPR activation potentially further exacerbates the secretion defects for Tg  
451 mutants by increasing the abundance of relevant PN components and promoting in-  
452 creased intracellular interactions. Consequently, reducing the engagement between mu-  
453 tant Tg variants and the identified chaperoning, oxidative folding, and ERAD targeting  
454 pathways could be a viable strategy to restore mutant Tg secretion (Gallagher & Walter,



455 2016; Cross *et al*, 2012; Plate & Wiseman, 2017). Our quantitative proteostasis interac-  
456 tome map forms the framework for the identification of single PN components or entire  
457 pathways as viable drug targets geared towards rescuing Tg secretion. Future studies  
458 directed at disrupting the individual protein interactions or reducing PN capacity in a co-  
459 ordinated manner through pharmacologic inhibition of UPR signaling pathways could re-  
460 veal the impact on rescue of CH-associated mutant Tg secretion.

461

## 462 **AUTHOR CONTRIBUTIONS**

463 M.T.W. and L.P. designed experiments. M.T.W., L.K., and L.P. performed the experi-  
464 ments and analyzed data. M.T.W. and L.P. wrote the manuscript.

465

## 466 **DATA DEPOSITION**

467 The mass spectrometry proteomics data have been deposited to the ProteomeXchange  
468 Consortium via the PRIDE partner repository with the dataset identifier PXD018379.

469

## 470 **ACKNOWLEDGEMENTS**

471 We thank Dr. Renā Robinson (Vanderbilt University) for the use of mass spectrometry  
472 resources and Dr. Reid Gilmore (University of Massachusetts Medical Center) for  
473 providing STT3A and STT3B knockout cell lines. This work was funded by the Vander-  
474 bilt Institute of Chemical Biology Fellowship, Vanderbilt Chemistry-Biology Interface  
475 Training Program (NIGMS, 5T32GM065086), National Science Foundation Graduate  
476 Research Fellowship Program (M.T.W.), and an NIGMS R35 award (1R35GM133552).

477

## 478 **METHODS**

479

### 480 **Plasmids and Antibodies**

481 FLAG-tagged (FT)-Tg in pcDNA3.1+/C-(K)-DYK plasmid was purchased from Genscript  
482 (Clone ID OHu20241). Site-directed mutagenesis was then performed to engineer FT-  
483 G2341R, FT-L2284P, FT-C1264R, FT-A2234D, and untagged Tg plasmids (Table S7).  
484 Primary antibodies were acquired from commercial sources and used at the indicated

485 dilutions in immunoblotting buffer (5% bovine serum albumin (BSA) in Tris-buffered sa-  
486 line pH 7.5, 0.1% Tween-20, and 0.1% sodium azide). Mouse monoclonal antibodies  
487 were used for the detection of KDEL (1:1000, Enzo Life Sciences, ADI-SPA-827), M2  
488 anti-FLAG (1:1000, Sigma Aldrich, F1804). Polyclonal rabbit antibodies were used to  
489 detect Calnexin (1:1000, GeneTex, GTX109669), PDIA4 (1:1000, Proteintech, 14712-1-  
490 AP) DNAJC10 (1:500, Proteintech, 13101-1-AP), thyroglobulin (1:1000, Proteintech,  
491 21714-1-AP), UGGT1 (1:1000, Proteintech, 14170-1-AP). STT3A (1:2000, Proteintech,  
492 12034-1-AP) and STT3B (1:2000, Proteintech, 15323-1-AP) Secondary antibodies were  
493 obtained from commercial sources and used at the indicated dilutions in 5% milk in Tris-  
494 buffered saline pH 7.5, 0.1% Tween-20 (TBS-T): Goat anti-mouse Starbright700  
495 (1:10000, Bio-Rad,12004158), Goat anti-rabbit IRDye800 (1:10000, LI-COR, 926-  
496 32211), Goat anti-rabbit Starbright520 (1:10000, Bio-Rad,12005869).

497

#### 498 **Cell Culture and Transfections**

499 HEK293<sup>DAX</sup> cells (Shoulders *et al*, 2013), HEK293T, and STT3A or STT3A KO  
500 HEK293T cells (Cherepanova & Gilmore, 2016) were grown in Dulbecco's modified Ea-  
501 gle's medium (DMEM) supplemented with 10 % fetal bovine serum (FBS), 1% L-gluta-  
502 mine (200mM), 1% penicillin (10,000U) / streptomycin (10,000  $\mu$ g/ml ). Generally, cells  
503 were transiently transfected with respective Tg expression plasmids using a calcium  
504 phosphate method.

505

#### 506 **Affinity Purification and MS Sample Preparation**

507 A fully confluent 10cm tissue culture plate (approximately  $10^7$  cells) was used per condi-  
508 tion. Cells were harvested by washing with PBS and incubating with 1mM EDTA in PBS  
509 on ice. A cell scraper was then used to dislodge cells. Cells were harvested, washed  
510 once with PBS, and treated with 0.5mM dithiobis(succinimidyl propionate) (DSP)  
511 (Thermo Scientific, PG82081) in PBS for 30 minutes at room temperature while rotating.  
512 Crosslinking was quenched by addition of 100mM Tris pH 7.5 for 15 minutes. Lysates  
513 were prepared by lysing in RIPA buffer (50mM Tris pH 7.5, 150mM NaCl, 0.1% SDS,  
514 1% Triton X-100, 0.5% deoxycholate and protease inhibitor cocktail (Roche,

515 4693159001)) and protein concentration was normalized. Cell lysates were then pre-  
516 cleared on 4B sepharose beads (Sigma, 4B200) at 4°C for 1 hour while rocking. Pre-  
517 cleared lysates were immunoprecipitated with M2 anti-flag agarose resin (Sigma,  
518 A2220) or G1 Anti-DYKDDDDK affinity resin (GenScript, L00432) overnight at 4°C while  
519 rocking. Resin was washed four times with RIPA buffer. Proteins were eluted twice in  
520 75uL elution buffer (2% SDS, 1mM EDTA, in PBS) by heating at 95°C for 5 minutes.  
521 Eluted samples were precipitated in methanol/chloroform, washed three times with  
522 methanol, and air dried. Protein pellets were then resuspended in 3uL 1% Rapigest SF  
523 Surfactant (Waters, 186002122) followed by the addition of 10uL of 50mM HEPES pH  
524 8.0, and 32.5uL of H<sub>2</sub>O. Samples were reduced with 5mM tris(2-carboxyethyl)phosphine  
525 (TCEP) (Sigma, 75259) at room temperature for 30 minutes and alkylated with 10mM  
526 iodoacetimide (Sigma, I6125) in the dark at room temperature for 30 minutes. 0.5 ug of  
527 Trypsin (Promega, V511A or Thermo Scientific, PI90057) was then added and incu-  
528 bated for 16-18 hours at 37°C, shaking at 700rpm. Peptides were reacted with TMT six-  
529 plex reagents (Thermo Fisher, 90066) in 40% v/v acetonitrile and incubated for one  
530 hour at room temperature. Reactions were quenched by the addition of ammonium bi-  
531 carbonate (0.4% w/v final concentration) and incubated for one hour at room tempera-  
532 ture. TMT labeled samples for a given experiment were then pooled and acidified with  
533 5% formic acid (Fisher, A117, v/v). Samples were concentrated using a speedvac and  
534 resuspended in buffer A (95% water, 4.9% acetonitrile, and 0.1% formic acid, v/v/v).  
535 Cleaved Rapigest SF surfactant was removed by centrifugation for 30 minutes at  
536 21,100 x g.

537

### 538 **Mass Spectrometry and Interactome Characterization**

539 MudPIT microcolumns were prepared as previously described (Fonslow *et al*, 2012).  
540 Peptide samples were directly loaded onto the columns using a high-pressure chamber.  
541 Samples were then washed for 30 minutes with buffer A (95% water, 4.9% acetonitrile,  
542 0.1% formic acid v/v/v). LC-MS/MS analysis was performed using a Q-Exactive HF  
543 (Thermo Fisher) or Exploris480 (Thermo Fisher) mass spectrometer equipped with an  
544 Ultimate3000 RSLCnano system (Thermo Fisher). MudPIT experiments were

545 performed with 10uL sequential injections of 0, 10, 30, 60, and 100% buffer C (500mM  
546 ammonium acetate in buffer A), followed by a final injection of 90% buffer C with 10%  
547 buffer B (99.9% acetonitrile, 0.1% formic acid v/v) and each step followed by a 130 mi-  
548 nute gradient from 5% to 80% B with a flow rate of either 300 or 500nL/minute on a  
549 20cm fused silica microcapillary column (ID 100 um) ending with a laser-pulled tip filled  
550 with Aqua C18, 3um, 100 Å resin (Phenomenex). Electrospray ionization (ESI) was per-  
551 formed directly from the analytical column by applying a voltage of 2.0 or 2.2kV with an  
552 inlet capillary temperature of 275°C. Using the Q-Exactive HF, data-dependent acquisi-  
553 tion of mass spectra was carried out by performing a full scan from 300-1800 m/z with a  
554 resolution of 60,000. The top 15 peaks for each full scan were fragmented by HCD us-  
555 ing normalized collision energy of 35 or 38, 0.7 m/z isolation window, 120 ms maximum  
556 injection time, at a resolution of 15,000 scanned from 100 to 1800 m/z and dynamic ex-  
557 clusion set to 60s. Using the Exploris480, data-dependent acquisition of mass spectra  
558 was carried out by performing a full scan from 400-1600m/z at a resolution of 120,000.  
559 Top-speed data acquisition was used for acquiring MS/MS spectra using a cycle time of  
560 3 seconds, with a normalized collision energy of 36, 0.4m/z isolation window, 120ms  
561 maximum injection time, at a resolution of 30000 with the first mass (m/z) starting at  
562 110. Peptide identification and TMT-based protein quantification was carried out using  
563 Proteome Discoverer 2.3 or 2.4. MS/MS spectra were extracted from Thermo Xcalibur  
564 .raw file format and searched using SEQUEST against a Uniprot human proteome data-  
565 base (released 05/2014). The database was curated to remove redundant protein and  
566 splice-isoforms, and supplemented with common biological MS contaminants. Searches  
567 were carried out using a decoy database of reversed peptide sequences and the follow-  
568 ing parameters: 10ppm peptide precursor tolerance, 0.02 Da fragment mass tolerance,  
569 minimum peptide length of 6 amino acids, trypsin cleavage with a maximum of two  
570 missed cleavages, dynamic methionine modification of 15.995 Da (oxidation), static cys-  
571 teine modification of 57.0215 Da (carbamidomethylation), and static N-terminal and ly-  
572 sine modifications of 229.1629 Da (TMT sixplex). SEQUEST search results were filtered  
573 using Percolator to minimize the peptide false discovery rate to 1% and a minimum of  
574 two peptides per protein identification. TMT reporter ion intensities were quantified using

575 the Reporter Ion Quantification processing node in Proteome Discoverer 2.3 or 2.4 and  
576 summed for peptides belonging to the same protein.

577

## 578 **Interactome Characterization and Pathway Enrichment Analysis**

579 To identify true interactors from non-specific background TMT intensities first underwent  
580 a  $\log_2$  transformation, were then median normalized using the formula:  $I_{n,TMT\alpha}^{norm} =$

581  $I_{n,TMT\alpha}^{unnorm} \cdot \frac{\sum_{TMT\gamma}^{TMT\alpha} \mathcal{M}}{\mathcal{M}_{TMT\alpha}}$ . Here,  $I_{n,TMT\alpha}^{norm}$  and  $I_{n,TMT\alpha}^{unnorm}$  are the unnormalized and normalized TMT

582 intensities for a given protein  $n$  found in TMT channels  $\alpha$ - $\gamma$ , and  $\mathcal{M}$  is the median TMT  
583 intensity value for TMT channels  $\alpha$ - $\gamma$ . TMT ratios were then calculated between respec-

584 tive Tg AP and control TMT channels using formula:  $\log_2 I_{n,TMT\alpha}^{norm} - \log_2 I_{n,TMT\gamma}^{norm}$ . The

585 mean of  $\log_2$  interaction differences was then calculated across the multiple LC-MS

586 batches (Fig. S2A). Significance of interaction differences was then calculated using a

587 paired, parametric, two tailed t-test of  $I_{n,TMT\alpha}^{norm}$ , and multiple testing correction via FDR

588 estimation (Storey & Tibshirani, 2003). A previously described method was used to de-

589 lineate true interactors from non-specific background (Keilhauer *et al*, 2015). In short,

590 the function  $y = c/(x - x_0)$  was used to, where  $c$  = curvature and  $x_0$  = minimum fold

591 change, set as one standard deviation of the of the Tg-containing TMT channel used for

592 comparison. The  $c$  parameter was optimized to separate true interactors from false po-

593 sitives (Fig. S2C and Table S1). Tg interactors were identified for WT and mutant Tg indi-

594 vidually. A cumulative list of identified interactors was then used for WT vs mutant Tg

595 comparisons. To compare WT vs mutant Tg interactors TMT intensities were normal-

596 ized using formula:  $I_{n,TMT\alpha}^{norm} = I_{n,TMT\alpha}^{unnorm} \cdot \frac{\sum_{TMT\gamma}^{TMT\alpha} I_{Tg}^{unnorm}}{I_{Tg,TMT\alpha}^{unnorm}}$ . Here,  $I_{n,TMT\alpha}^{norm}$  and  $I_{n,TMT\alpha}^{unnorm}$  are the

597 unnormalized and normalized TMT intensities for a given protein  $n$  found in TMT chan-

598 nels  $\alpha$ - $\gamma$ , and  $I_{Tg}^{unnorm}$  is the unnormalized TMT intensity value for Tg in a given TMT

599 channel  $\alpha$ - $\gamma$ . For pathway enrichment analysis of identified protein, EnrichR was used

600 and GO Cellular Component 2018 terms were used to differentiate secretory pathway

601 associated proteins from background (Table S3) (Chen *et al*, 2013). Tg interactors were

602 similarly analyzed using GO Molecular Function 2018 terms (Tables S3 and 5). The

603 dataset used for the mass spectrometry interactome characterization experiments  
604 showing protein identification and quantification are included in Table S8. Spectrum and  
605 result files are available via ProteomeXchange with identifier PXD018379.

606

### 607 **Immunoblotting, SDS-PAGE, and Immunoprecipitation**

608 Cell lysates were prepared by lysing in RIPA buffer with protease inhibitor cocktail and  
609 protein concentrations were normalized. Lysates were then denatured with 1X Laemmli  
610 buffer + 100mM DTT and heated at 95°C for 5 minutes before being separated by SDS-  
611 PAGE. Samples were transferred onto polyvinylidene difluoride (PVDF) membranes  
612 (Millipore) for immunoblotting and blocked in 5% milk in tris-buffered saline, 0.1%  
613 Tween-20 (TBS-T). Primary antibodies were incubated either at room temperature for 2  
614 hours, or overnight at 4°C. Membranes were then washed four times with TBS-T and in-  
615 cubated with secondary antibody constituted in 5% non-fat dry milk/TBS-T either at  
616 room temperature for 1 hour or overnight at 4°C. Membranes were washed four times  
617 with TBS-T and then imaged using a ChemiDoc MP Imaging System (BioRad). Quantifi-  
618 cation was performed using Image Lab Software (BioRad). For Tg immunoprecipitation,  
619 normalized lysates were incubated with M2 anti-flag agarose resin or G1 Anti-  
620 DYKDDDDK affinity resin overnight at 4°C. Resin was then washed four times with  
621 RIPA buffer and samples were eluted using 3X Laemmli buffer with 100mM DTT. For  
622 immunoblot confirmation of Tg interactors samples were processed exactly as de-  
623 scribed above for interactome characterization and proteins were eluted once with elu-  
624 tion buffer (2% SDS, 1mM EDTA, in PBS) by heating at 95°C for 5 minutes.

625

### 626 **Cycloheximide Chase Assay**

627 In general, 6-well dishes of transfected cells were plated onto poly-D-lysine coated  
628 plates and cells were washed twice with 2mL of media treated with cycloheximide (50  
629 µg/mL), then chased with 1mL of cycloheximide-treated media and collected at various  
630 time points. Cells were harvested by aspirating media, washing cells twice with 2mL of  
631 cold PBS and lysing in 1mL RIPA buffer with protease inhibitor cocktail (Roche,  
632 4693159001). Collected media was spun down at 400x g for 5 minutes to pellet any

633 floating cells. Cell lysate and media was subjected to immunoprecipitation with M2 anti-  
634 flag agarose resin or G1 Anti-DYKDDDDK affinity resin overnight at 4°C. Resin was  
635 then washed four times with RIPA buffer and samples were eluted using 3X Laemmli  
636 buffer with 100mM DTT. Eluted samples were separated by SDS-PAGE and transferred  
637 to PVDF membrane and probed with primary and secondary antibody as described  
638 above.

639

#### 640 **<sup>35</sup>S Pulse Chase Assay**

641 In general, 6-well dishes of transfected cells were plated onto poly-D-lysine coated  
642 plates and cells were incubated with methionine and cysteine depleted DMEM supple-  
643 mented with glutamine, penicillin/streptomycin, and 10% FBS at 37°C for 30 minutes.  
644 Cells were then metabolically labeled in DMEM depleted of methionine and cysteine,  
645 and supplemented with EasyTag <sup>35</sup>S Protein Labeling Mix (Perkin Elmer,  
646 NEG772007MC), glutamine, penicillin/streptomycin, and 10% FBS at 37°C for 30  
647 minutes. Afterward, cells were washed twice with DMEM containing 10 X methionine  
648 and cysteine, followed by a burn off period of 30 minutes in normal DMEM. Cells were  
649 then chased for the respective time period with normal DMEM, lysed with 500uL of  
650 RIPA buffer with protease inhibitor cocktail containing 10mM dithiothreitol (DTT) as de-  
651 scribed above. Insoluble debris was pelleted by centrifugation at 21,100x g for 15  
652 minutes. Cell lysates were then diluted with 500uL of RIPA buffer with protease inhibitor  
653 cocktail and subjected to immunoprecipitation with G1 anti-DYKDDDDK affinity resin  
654 overnight at 4°C. After three washes with RIPA buffer protein samples were eluted with  
655 3X Laemmli buffer with 100mM DTT heating at 95°C for 5 minutes. Eluted samples  
656 were then separated by SDS-PAGE, gels were dried and exposed on a storage phos-  
657 phor screen. Radioactive band intensity was then measured using a Typhoon Trio Im-  
658 ager (GE Healthcare) and quantified by densitometry in Image Lab (BioRad).

659

#### 660 **EndoH and PNGaseF Treatment**

661 Cells were lysed in either RIPA or TNI (50mM Tris pH 7.5, 250mM NaCl, 1mM EDTA,  
 662 and 0.5% IGEPAL) buffer with protease inhibitor cocktail, denatured, and digested with  
 663 EndoH or PNGase F per the manufacturer specifications (New England BioLabs)

664  
 665  
 666 **FIGURES**  
 667

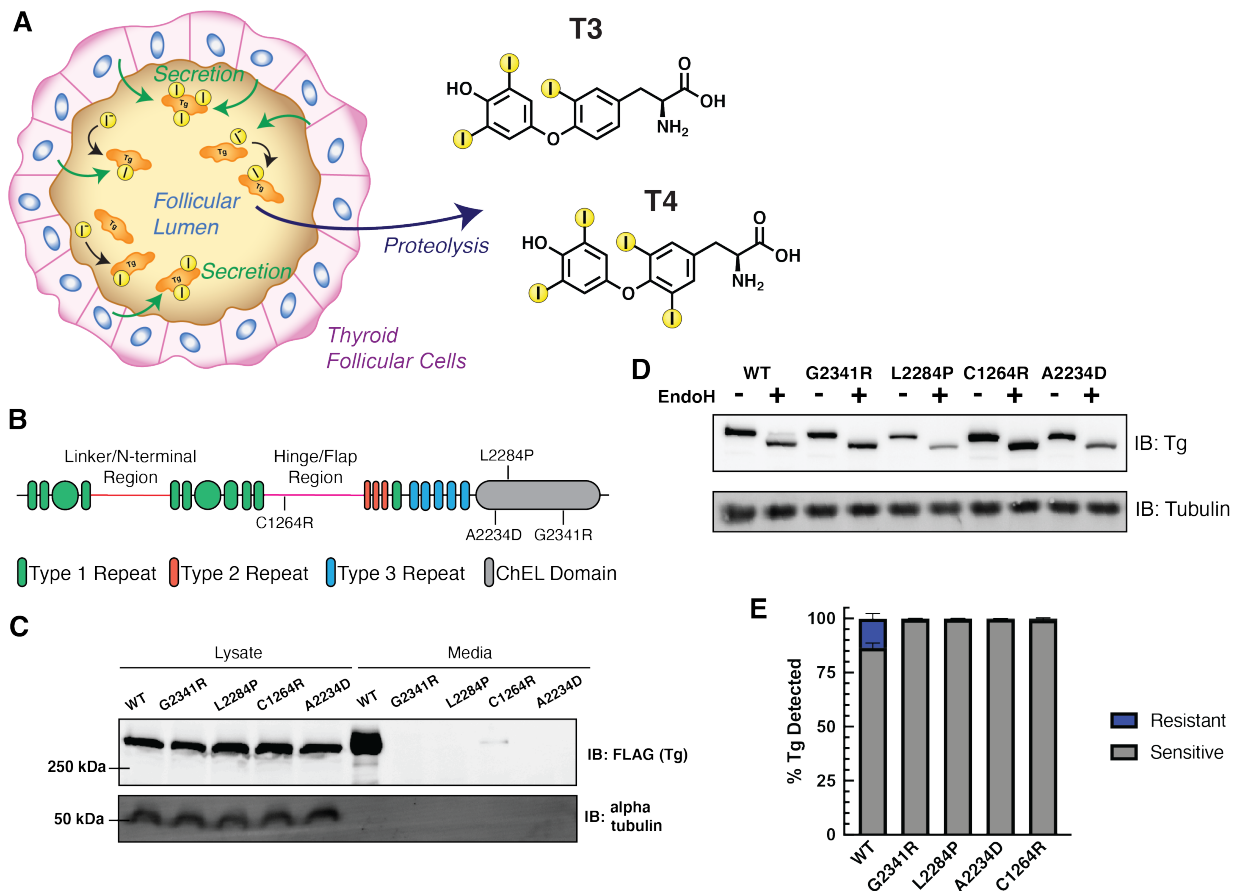

668

669

670 **Figure 1. Distinct Tg mutants present secretion defects.**

671 **A.** Schematic detailing Tg processing and subsequent hormone production. Tg is syn-  
 672 thesized in follicular cells and secreted into the follicular lumen where it undergoes io-  
 673 dination and is stored. Tg is later taken up and proteolyzed leading to the liberation of  
 674 T3 and T4 hormones. **B.** Schematic of Tg domain organization consisting of cysteine  
 675 rich repeats, a linker/N-terminal region, and hinge/flap region followed by a



676 cholinesterase like (ChEL) C-terminal domain. **C.** Immunoblot for Flag-tagged Tg ex-  
677 pressed in transiently transfected HEK293T cells. All Tg variants are detected in the ly-  
678 sate while only WT is detected in cell culture media. **D.** Western blot for Tg probing En-  
679 doH sensitivity to remove high-mannose glycans of ER localized Tg. **E.** Quantification of  
680 EndoH sensitivity in D. All Tg mutants are 100% EndoH sensitive, showing they are re-  
681 tained within the ER and model a hypothyroidism phenotype. Error bars show SEM for 4  
682 biological replicates.

683

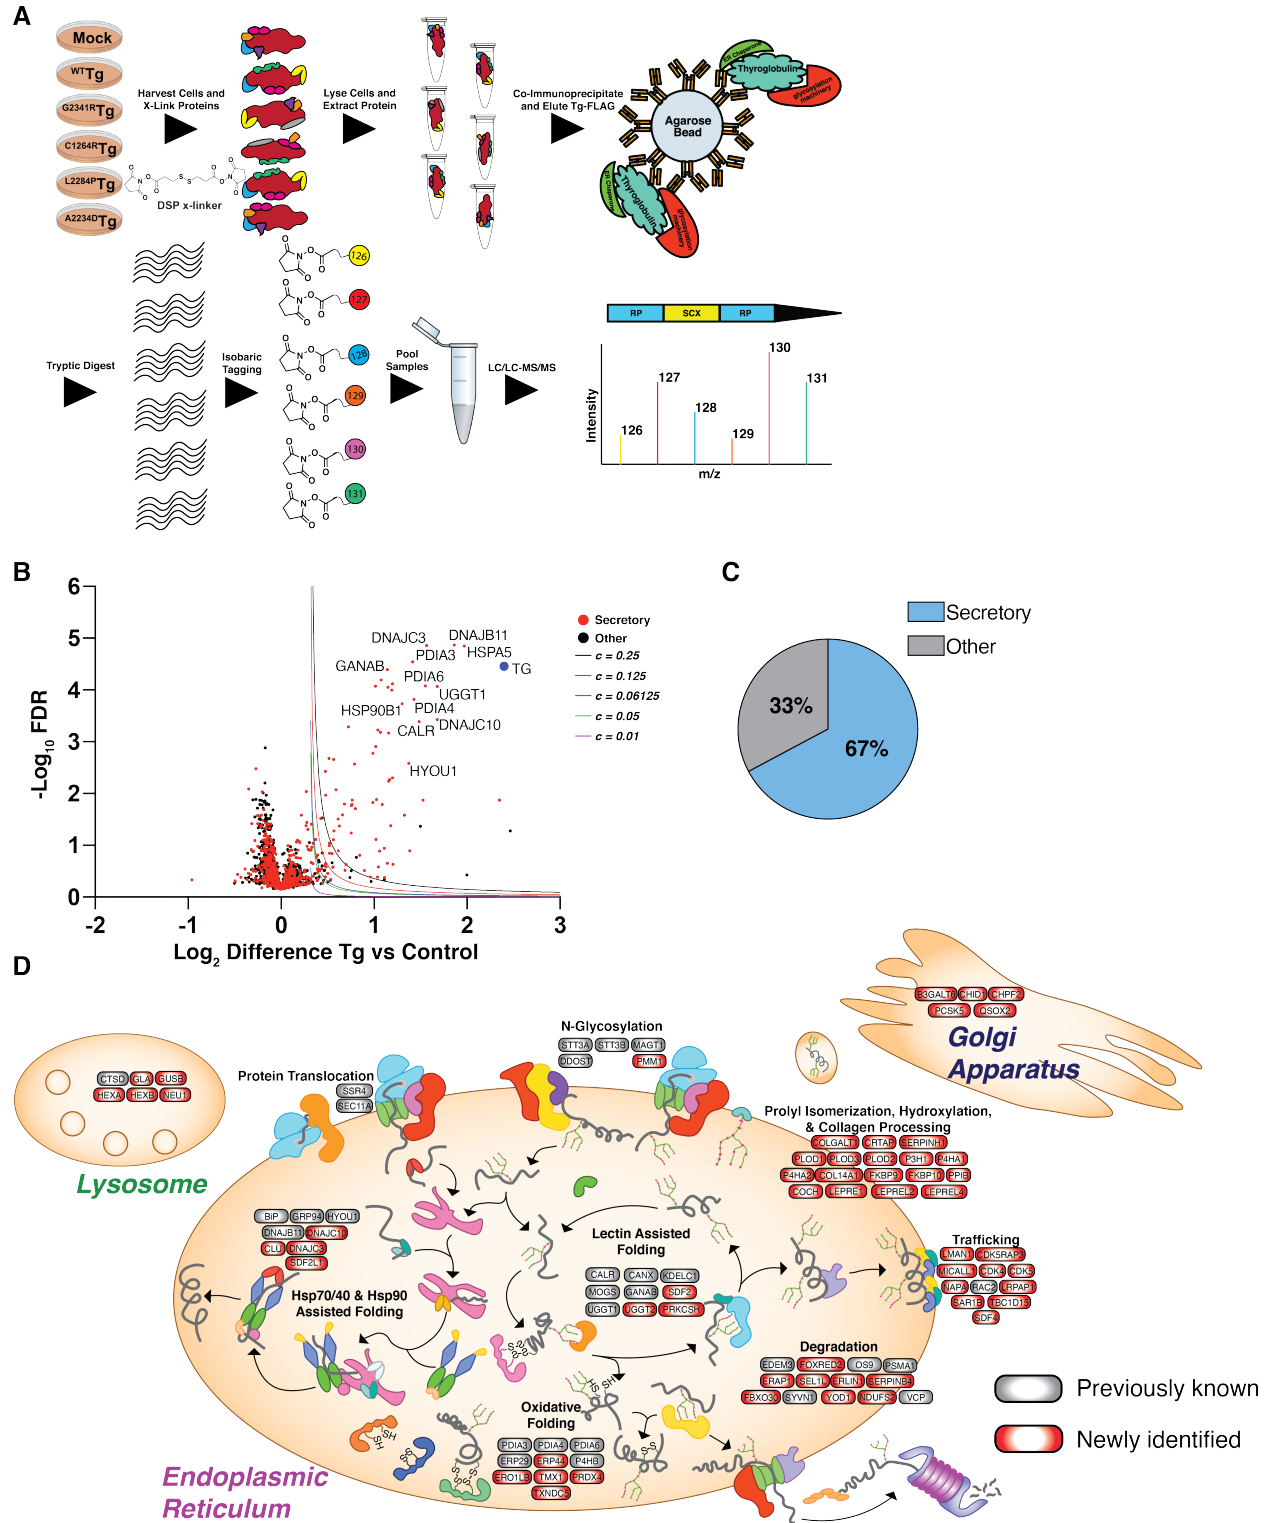

684

685

686

**Figure 2. Defining the Tg interactome using multiplexed quantitative AP-MS.**

687 **A.** Schematic detailing the multiplexed quantitative interactomics workflow utilizing in-  
688 situ crosslinking, affinity purification - mass spectrometry (AP-MS), and tandem mass  
689 tags (TMT) for relative quantification of identified interactors to delineate interaction  
690 changes from WT to mutant variants. **B.** Volcano plot showing TMT enrichment ratios  
691 ( $\log_2$  difference all Tg channels versus all mock channels) versus  $-\log_{10}$  false discovery  
692 rate (Storey) for coimmunoprecipitated proteins of all Tg channels compared to all mock  
693 channels (n = 13 biological replicates). Variable cutoffs were used to optimize confident  
694 interactors of Tg. Optimization described in Fig. S2 and Table S1. Source data found in  
695 Table S4. **C.** Proteins found to be confident interactors with Tg are enriched within the  
696 secretory pathway. Source data found in Table S3. **D.** Schematic detailing newly identi-  
697 fied Tg interactors (red) compared to previously publishes interactors (grey). Tg interac-  
698 tors are organized by biological function and organellar localization.  
699

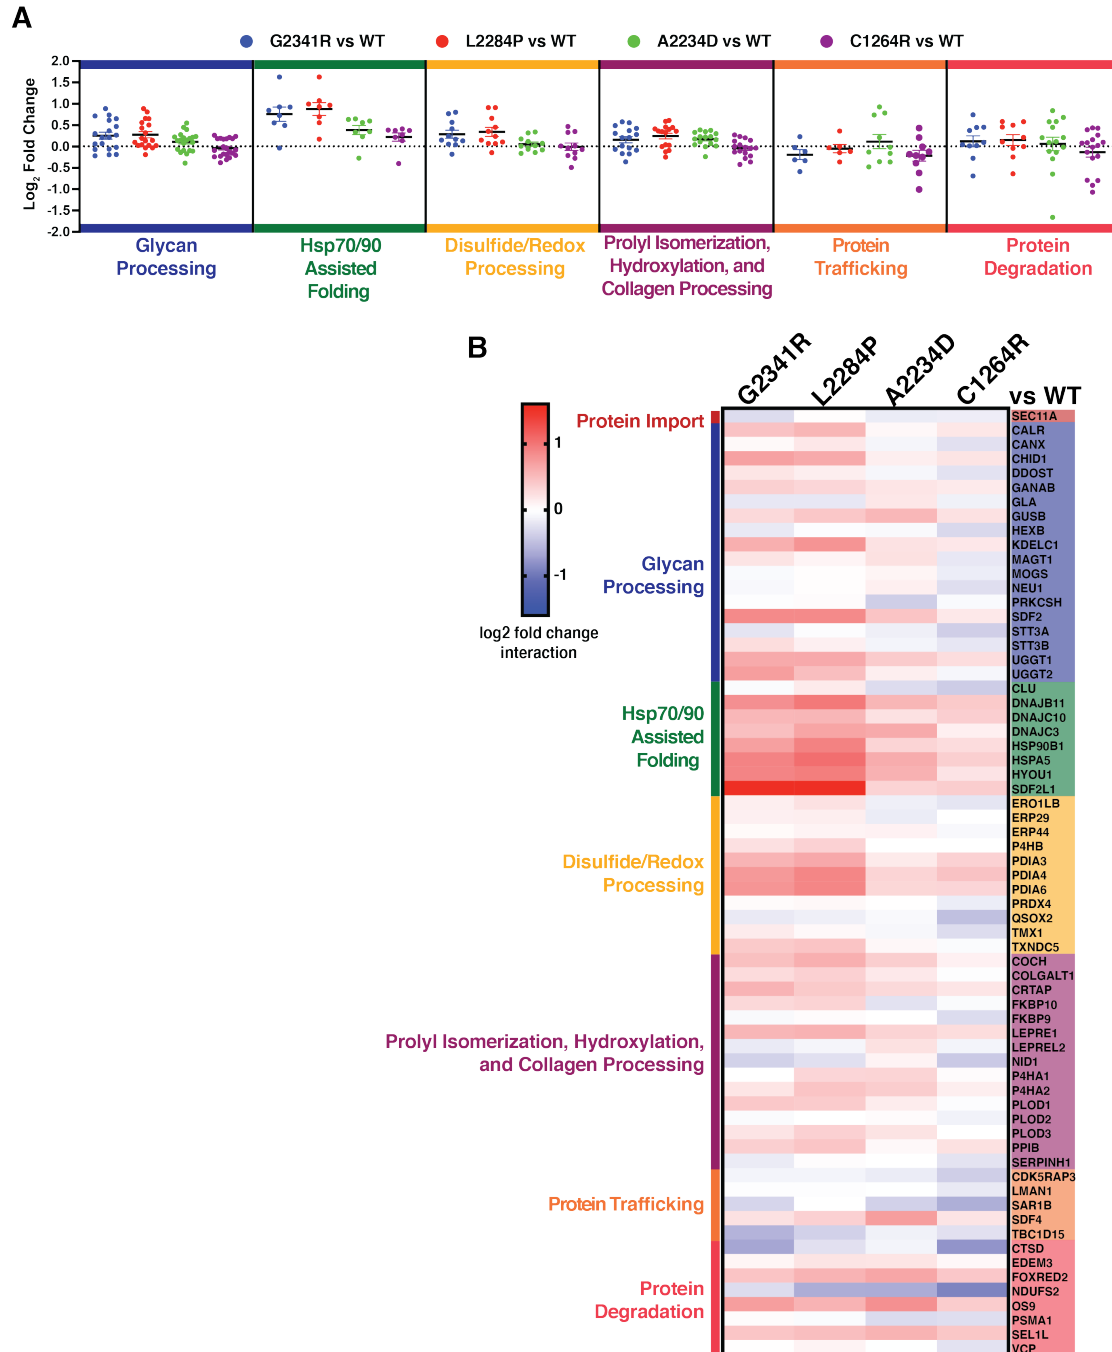

700

701 **Figure 3. The secretion defect of Tg mutants is associated with both common and**  
 702 **mutant specific changes in proteostasis interactions.**

703 **A.** Dot plots displaying aggregate interactome changes of proteostasis pathways be-  
 704 tween the different mutant Tg variants (G2341R, L2284P, A2234D, C1264R) compared  
 705 to WT. Proteostasis factors are grouped based on biological function as in Fig. 3B and  
 706 dots represent interaction changes for individual high-confidence interactors of Tg

707 belonging to each group. Source data found in Table S5 and 6. **B.** Heatmap displaying  
 708 altered interactions of mutant Tg variants with individual proteostasis components that  
 709 were identified as high-confidence interactors. Interactors are grouped by biological  
 710 function as in Fig. 3A. Source data found in Table S5 and 6.  
 711  
 712

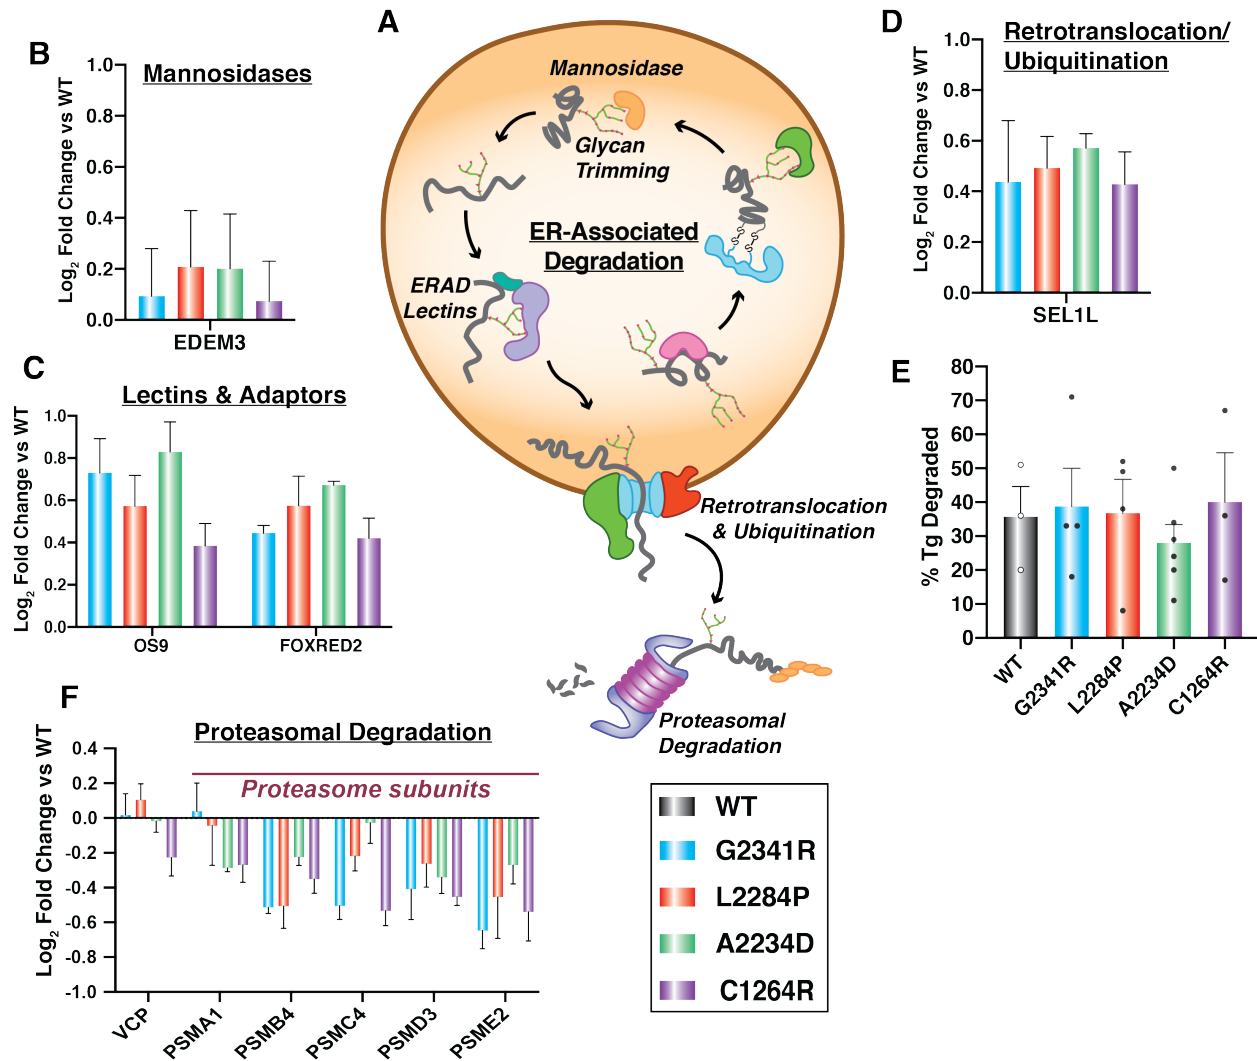

713  
 714 **Figure 4. Tg mutants are increasingly routed towards ER-associated degradation**  
 715 **machineries but not degraded at faster rates.**  
 716 **A.** Schematic detailing the ERAD pathway: degradation factors targeting proteins  
 717 through glycan trimming, subsequent retrotranslocation and ubiquitination, followed by  
 718 proteasome-mediated degradation in the cytosol. **B – D.** Interaction changes of Tg

719 mutants compared to WT with individual ERAD factors that were identified as high-con-  
720 fidence interactors of Tg. Error bars show SEM. **B.** Mannosidases responsible for gly-  
721 can trimming. **C.** An ERAD specific lectin (OS-9) and another ERAD factor (FOXRED2)  
722 **D.** A subunit of the retrotranslocation complex. **E.** Plot showing the percentage of Tg  
723 degradation measured in HEK293<sup>DAX</sup> cells 4 hours after treatment with 50 $\mu$ g/mL of cy-  
724 cloheximide to block new protein translation. Error bars show SEM for 3-6 biological  
725 replicates. There is no significant difference in degradation for any of the Tg mutants  
726 compared to WT. Student's parametric T test was used to determine significant  
727 changes ( $p < 0.05$ ). G2341R:  $p = 0.849$ , L2284P:  $p = 0.942$ , A2234D:  $p = 0.464$ ,  
728 C1264R:  $p = 0.813$ . Representative Western blots for the CHX chase experiments are  
729 shown in Fig. S4B. **F.** Interaction changes of Tg mutants compared to WT for cytosolic  
730 proteins involved in proteasome-mediated protein degradation. Error bars shows SEM.  
731

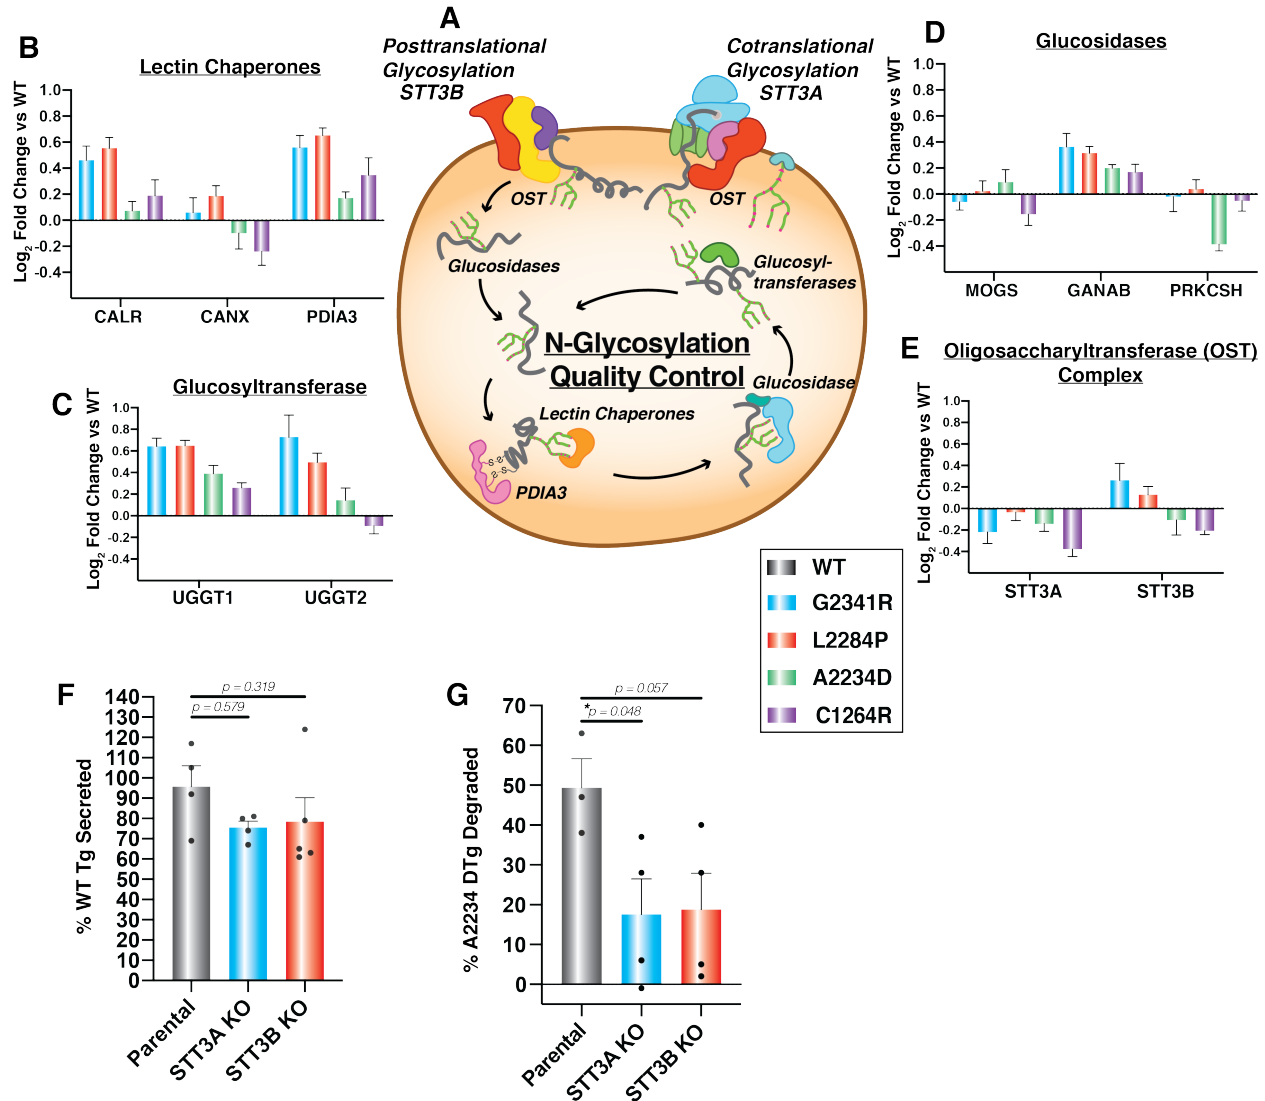

732

733 **Figure 5. Perturbation of N-linked glycosylation distinctly impacts A2234D Tg.**

734 **A.** Schematic detailing the N-glycosylation and lectin-mediated folding pathway. Glyco-  
 735 sylation is carried out by two distinct OST complexes containing STT3A or STT3B as  
 736 catalytic subunits. Glucosidases then trim terminal glucose residues, lectin chaperones  
 737 (CANX, CALR) and PDIA3 assist in folding, followed by further glucose trimming. Sub-  
 738 sequently, glucosyltransferases (UGGT1, UGGT2) serve as quality control sensors to  
 739 re-glucosylate improperly folded proteins for iterative chaperoning cycles. **B – E.** Inter-  
 740 action changes of Tg mutants compared to WT with individual N-glycosylation quality  
 741 control factors that were identified as high-confidence interactors of Tg. Error bars show  
 742 SEM. **B.** Lectin chaperones and lectin-associated protein disulfide isomerase PDIA3. **C.**

743 Glucosyltransferases sensing misfolded proteins. **D.** Glucosidases involved in glycan  
744 trimming. **E.** Catalytic subunits of the OST complex STT3A responsible for cotransla-  
745 tional glycosylation and STT3B responsible for posttranslational glycosylation. **F.** Com-  
746 parison of WT Tg secretion in parental, STT3A, or STT3B KO HEK293T cells. WT Tg  
747 was transiently transfected into the respective cells and newly synthesized proteins  
748 were metabolically labeled for 30 min with  $^{35}\text{S}$  and then chased with unlabeled media.  
749  $^{35}\text{S}$ -labeled protein was quantified in the media and lysate after 4 hours. % Tg secreted  
750 was calculated as  $\text{Tg}_{\text{media}, 4\text{h}} / (\text{Tg}_{\text{lysate}, 0\text{h}} + \text{Tg}_{\text{media}, 0\text{h}})$ . Error bars represent SEM of 3-4  
751 biological replicates. STT3A or STT3B KO do not significantly alter WT secretion. Stu-  
752 dent's parametric t test was used to determine significant ( $p < 0.05$ ) changes in Tg se-  
753 cretion and p values are indicated. Representative autoradiograms are shown in Fig.  
754 S4J. **G.** Comparison of A2234D Tg degradation in parental, STT3A, or STT3B KO  
755 HEK293T cells. A2234D Tg was transiently transfected into the respective cells and  
756 subjected to the same  $^{35}\text{S}$ -pulse labeling scheme as in F % Tg degraded was calculated  
757 as  $1 - (\text{Tg}_{\text{lysate}, 4\text{h}} / \text{Tg}_{\text{lysate}, 0\text{h}})$ . Error bars represent SEM of 3-4 biological replicates.  
758 Representative autoradiograms are shown in Fig. S4I. Student's parametric t test was  
759 used to determine significant ( $p < 0.05$ ) changes in Tg degradation and p values are in-  
760 dicated.

761

762



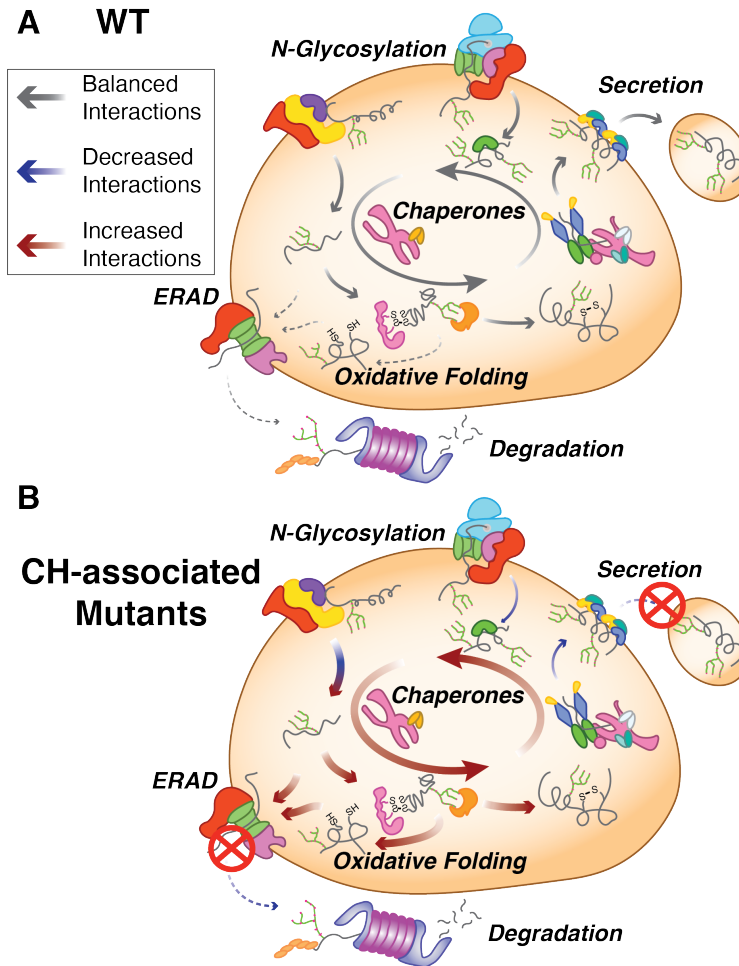

763

764 **Figure 6. Model for common and mutant-specific proteostasis interactome**  
765 **changes mediating the secretion defect of CH-associated Tg variants.**

766 **A.** In the case of WT Tg processing (top) the delicate balance of proper chaperoning,  
767 post-translational modification and secretion are maintained to provide sufficient Tg pro-  
768 cessing, secretion, and subsequent hormone production (indicated by the arrow size  
769 and color code denoted in the key). **B.** In the case of secretion-defective, CH-associ-  
770 ated Tg mutants (bottom) this balance between chaperoning is shifted in such a way  
771 that increased chaperoning and engagement with oxidative folding enzymes, possibly  
772 stemming from altered engagement with the OST complex dominates Tg processing  
773 (indicated by the arrow size and color code denoted in the key). Additionally, mutant Tg  
774 is increasing marked for degradation, yet inefficient retrotranslocation or decreased en-  
775 gagement by the proteasome leads to degradation rates remaining consistent com-  
776 pared to WT.

777 **REFERENCES**

778

779 Allen S, Naim HY & Bulleid NJ (1995) Intracellular Folding of Tissue-type Plasminogen  
780 Activator. *J. Biol. Chem.* **270**: 4797–4804 Available at:

781 <http://www.jbc.org/lookup/doi/10.1074/jbc.270.9.4797>

782 Avezov E, Frenkel Z, Ehrlich M, Herscovics A & Lederkremer GZ (2008) Endoplasmic  
783 Reticulum (ER) Mannosidase I Is Compartmentalized and Required for N -Glycan  
784 Trimming to Man 5–6 GlcNAc 2 in Glycoprotein ER-associated Degradation. *Mol.*  
785 *Biol. Cell* **19**: 216–225 Available at:

786 <https://www.molbiolcell.org/doi/10.1091/mbc.e07-05-0505>

787 Awad W, Estrada I, Shen Y & Hendershot LM (2008) BiP mutants that are unable to  
788 interact with endoplasmic reticulum DnaJ proteins provide insights into interdomain  
789 interactions in BiP. *Proc. Natl. Acad. Sci.* **105**: 1164–1169 Available at:

790 <http://www.pnas.org/cgi/doi/10.1073/pnas.0702132105>

791 Balchin D, Hayer-Hartl M & Hartl FU (2016) In vivo aspects of protein folding and quality  
792 control. *Science* **353**: aac4354 Available at:

793 <https://www.sciencemag.org/lookup/doi/10.1126/science.aac4354>

794 Baryshev M, Sargsyan E, Wallin G, Lejniaks A, Furudate S, Hishinuma A & Mkrtchian S  
795 (2004) Unfolded protein response is involved in the pathology of human congenital  
796 hypothyroid goiter and rat non-goitrous congenital hypothyroidism. *J. Mol.*

797 *Endocrinol.* **32**: 903–20 Available at:

798 <https://jme.bioscientifica.com/view/journals/jme/32/3/903.xml>

799 Behnke J, Mann MJ, Scruggs F-L, Feige MJ & Hendershot LM (2016) Members of the  
800 Hsp70 Family Recognize Distinct Types of Sequences to Execute ER Quality  
801 Control. *Mol. Cell* **63**: 739–752 Available at:

802 <https://linkinghub.elsevier.com/retrieve/pii/S1097276516303653>

803 Bernasconi R, Pertel T, Luban J & Molinari M (2008) A dual task for the Xbp1-  
804 responsive OS-9 variants in the mammalian endoplasmic reticulum: Inhibiting  
805 secretion of misfolded protein conformers and enhancing their disposal. *J. Biol.*  
806 *Chem.* **283**: 16446–16454

807 Braunger K, Pfeffer S, Shrimal S, Gilmore R, Berninghausen O, Mandon EC, Becker T,  
808 Förster F & Beckmann R (2018) Structural basis for coupling protein transport and  
809 N-glycosylation at the mammalian endoplasmic reticulum. *Science (80-. ).* **360**:

810 215–219 Available at:

811 <https://www.sciencemag.org/lookup/doi/10.1126/science.aar7899>

812 Caputo M, Rivolta CM, Esperante SA, Gruñeiro-Papendieck L, Chiesa A, Pellizas CG,  
813 González-Sarmiento R & Targovnik HM (2007) Congenital hypothyroidism with  
814 goitre caused by new mutations in the thyroglobulin gene. *Clin. Endocrinol. (Oxf).*

815 **67**: 351–357 Available at: <http://doi.wiley.com/10.1111/j.1365-2265.2007.02889.x>

816 Carvalho DP & Dupuy C (2017) Thyroid hormone biosynthesis and release. *Mol. Cell.*  
817 *Endocrinol.* **458**: 6–15 Available at:

818 <https://linkinghub.elsevier.com/retrieve/pii/S0303720717300515>

819 Carvalho P, Goder V & Rapoport TA (2006) Distinct Ubiquitin-Ligase Complexes Define  
820 Convergent Pathways for the Degradation of ER Proteins. *Cell* **126**: 361–373

- 821 Available at: <https://linkinghub.elsevier.com/retrieve/pii/S0092867406008579>  
822 Chaker L, Bianco AC, Jonklaas J & Peeters RP (2017) Hypothyroidism. *Lancet* **390**:  
823 1550–1562 Available at:  
824 <https://linkinghub.elsevier.com/retrieve/pii/S0140673617307031>  
825 Chen EY, Tan CM, Kou Y, Duan Q, Wang Z, Meirelles G, Clark NR & Ma'ayan A (2013)  
826 Enrichr: interactive and collaborative HTML5 gene list enrichment analysis tool.  
827 *BMC Bioinformatics* **14**: 128 Available at:  
828 <http://bmcbioinformatics.biomedcentral.com/articles/10.1186/1471-2105-14-128>  
829 Chen JJ, Genereux JC, Qu S, Hulleman JD, Shoulders MD & Wiseman RL (2014) ATF6  
830 Activation Reduces the Secretion and Extracellular Aggregation of Destabilized  
831 Variants of an Amyloidogenic Protein. *Chem. Biol.* **21**: 1564–1574 Available at:  
832 <https://linkinghub.elsevier.com/retrieve/pii/S1074552114003275>  
833 Cherepanova NA & Gilmore R (2016) Mammalian cells lacking either the cotranslational  
834 or posttranslocational oligosaccharyltransferase complex display substrate-  
835 dependent defects in asparagine linked glycosylation. *Sci. Rep.* **6**: 1–12  
836 Christianson JC, Olzmann JA, Shaler TA, Sowa ME, Bennett EJ, Richter CM, Tyler RE,  
837 Greenblatt EJ, Wade Harper J & Kopito RR (2012) Defining human ERAD networks  
838 through an integrative mapping strategy. *Nat. Cell Biol.* **14**: 93–105  
839 Christianson JC, Shaler TA, Tyler RE & Kopito RR (2008) OS-9 and GRP94 deliver  
840 mutant  $\alpha$ 1-antitrypsin to the Hrd1–SEL1L ubiquitin ligase complex for ERAD. *Nat.*  
841 *Cell Biol.* **10**: 272–282 Available at: <http://www.nature.com/articles/ncb1689>  
842 Citterio CE, Targovnik HM & Arvan P (2019) The role of thyroglobulin in thyroid  
843 hormonogenesis. *Nat. Rev. Endocrinol.* **15**: 323–338 Available at:  
844 <http://www.nature.com/articles/s41574-019-0184-8>  
845 Cooley CB, Ryno LM, Plate L, Morgan GJ, Hulleman JD, Kelly JW & Wiseman RL  
846 (2014) Unfolded protein response activation reduces secretion and extracellular  
847 aggregation of amyloidogenic immunoglobulin light chain. *Proc. Natl. Acad. Sci.*  
848 **111**: 13046–13051 Available at:  
849 <http://www.pnas.org/cgi/doi/10.1073/pnas.1406050111>  
850 Coscia F, Taler-Verčič A, Chang VT, Sinn L, O'Reilly FJ, Izoré T, Renko M, Berger I,  
851 Rappsilber J, Turk D & Löwe J (2020) The structure of human thyroglobulin. *Nature*  
852 **578**: 627–630 Available at: <http://www.nature.com/articles/s41586-020-1995-4>  
853 Cross BCS, Bond PJ, Sadowski PG, Jha BK, Zak J, Goodman JM, Silverman RH,  
854 Neubert TA, Baxendale IR, Ron D & Harding HP (2012) The molecular basis for  
855 selective inhibition of unconventional mRNA splicing by an IRE1-binding small  
856 molecule. *Proc. Natl. Acad. Sci.* **109**: E869–E878 Available at:  
857 <http://www.pnas.org/cgi/doi/10.1073/pnas.1115623109>  
858 Dai G, Levy O & Carrasco N (1996) Cloning and characterization of the thyroid iodide  
859 transporter. *Nature* **379**: 458–460 Available at:  
860 <http://www.nature.com/articles/379458a0>  
861 Doan N-D, DiChiara AS, Del Rosario AM, Schiavoni RP & Shoulders MD (2019) Mass  
862 Spectrometry-Based Proteomics to Define Intracellular Collagen Interactomes.  
863 *Methods Mol. Biol.* **1944**: 95–114 Available at:  
864 <http://www.ncbi.nlm.nih.gov/pubmed/30840237> [Accessed April 8, 2020]

- 865 Fayadat L, Niccoli-Sire P, Lanet J & Franc J-L (1999) Role of Heme in Intracellular  
866 Trafficking of Thyroperoxidase and Involvement of H<sub>2</sub>O<sub>2</sub> Generated at the Apical  
867 Surface of Thyroid Cells in Autocatalytic Covalent Heme Binding. *J. Biol. Chem.*  
868 **274**: 10533–10538 Available at:  
869 <http://www.jbc.org/lookup/doi/10.1074/jbc.274.15.10533>
- 870 Fonslow BR, Niessen SM, Singh M, Wong CCL, Xu T, Carvalho PC, Choi J, Park SK &  
871 Yates JR (2012) Single-Step Inline Hydroxyapatite Enrichment Facilitates  
872 Identification and Quantitation of Phosphopeptides from Mass-Limited Proteomes  
873 with MudPIT. *J. Proteome Res.* **11**: 2697–2709 Available at:  
874 <https://pubs.acs.org/doi/10.1021/pr300200x>
- 875 Gallagher CM & Walter P (2016) Ceapins inhibit ATF6 $\alpha$  signaling by selectively  
876 preventing transport of ATF6 $\alpha$  to the Golgi apparatus during ER stress. *Elife* **5**:  
877 Available at: <https://elifesciences.org/articles/11880>
- 878 Hammond C, Braakman I & Helenius A (1994) Role of N-linked oligosaccharide  
879 recognition, glucose trimming, and calnexin in glycoprotein folding and quality  
880 control. *Proc. Natl. Acad. Sci.* **91**: 913–917 Available at:  
881 <http://www.pnas.org/cgi/doi/10.1073/pnas.91.3.913>
- 882 Hartl FU, Bracher A & Hayer-Hartl M (2011) Molecular chaperones in protein folding  
883 and proteostasis. *Nature* **475**: 324–332 Available at:  
884 <http://www.nature.com/articles/nature10317>
- 885 Hetz C, Axten JM & Patterson JB (2019) Pharmacological targeting of the unfolded  
886 protein response for disease intervention. *Nat. Chem. Biol.* **15**: 764–775 Available  
887 at: <http://www.nature.com/articles/s41589-019-0326-2>
- 888 Hirao K, Natsuka Y, Tamura T, Wada I, Morito D, Natsuka S, Romero P, Sleno B,  
889 Tremblay LO, Herscovics A, Nagata K & Hosokawa N (2006) EDEM3, a soluble  
890 EDEM homolog, enhances glycoprotein endoplasmic reticulum-associated  
891 degradation and mannose trimming. *J. Biol. Chem.* **281**: 9650–9658
- 892 Hishinuma A (1999) Two Novel Cysteine Substitutions (C1263R and C1995S) of  
893 Thyroglobulin Cause a Defect in Intracellular Transport of Thyroglobulin in Patients  
894 with Congenital Goiter and the Variant Type of Adenomatous Goiter. *J. Clin.*  
895 *Endocrinol. Metab.* **84**: 1438–1444 Available at:  
896 <http://press.endocrine.org/doi/10.1210/jcem.84.4.5633>
- 897 Di Jeso B & Arvan P (2016) Thyroglobulin From Molecular and Cellular Biology to  
898 Clinical Endocrinology. *Endocr. Rev.* **37**: 2–36 Available at:  
899 <https://academic.oup.com/edrv/article/37/1/2/2354690>
- 900 Di Jeso B, Morishita Y, Treglia AS, Lofrumento DD, Nicolardi G, Beguinot F, Kellogg AP  
901 & Arvan P (2014) Transient Covalent Interactions of Newly Synthesized  
902 Thyroglobulin with Oxidoreductases of the Endoplasmic Reticulum. *J. Biol. Chem.*  
903 **289**: 11488–11496 Available at:  
904 <http://www.jbc.org/lookup/doi/10.1074/jbc.M113.520767>
- 905 Di Jeso B, Park Y -n., Ulianich L, Treglia AS, Urbanas ML, High S & Arvan P (2005)  
906 Mixed-Disulfide Folding Intermediates between Thyroglobulin and Endoplasmic  
907 Reticulum Resident Oxidoreductases ERp57 and Protein Disulfide Isomerase. *Mol.*  
908 *Cell. Biol.* **25**: 9793–9805 Available at:

- 909 <http://mcb.asm.org/cgi/doi/10.1128/MCB.25.22.9793-9805.2005>
- 910 Kanou Y, Hishinuma A, Tsunekawa K, Seki K, Mizuno Y, Fujisawa H, Imai T, Miura Y,  
911 Nagasaka T, Yamada C, Ieiri T, Murakami M & Murata Y (2007) Thyroglobulin  
912 Gene Mutations Producing Defective Intracellular Transport of Thyroglobulin Are  
913 Associated with Increased Thyroidal Type 2 Iodothyronine Deiodinase Activity. *J.*  
914 *Clin. Endocrinol. Metab.* **92**: 1451–1457 Available at:  
915 <https://academic.oup.com/jcem/article-lookup/doi/10.1210/jc.2006-1242>
- 916 Keilhauer EC, Hein MY & Mann M (2015) Accurate Protein Complex Retrieval by  
917 Affinity Enrichment Mass Spectrometry (AE-MS) Rather than Affinity Purification  
918 Mass Spectrometry (AP-MS). *Mol. Cell. Proteomics* **14**: 120–135 Available at:  
919 <http://www.mcponline.org/lookup/doi/10.1074/mcp.M114.041012>
- 920 Kelleher DJ, Karaoglu D, Mandon EC & Gilmore R (2003) Oligosaccharyltransferase  
921 Isoforms that Contain Different Catalytic STT3 Subunits Have Distinct Enzymatic  
922 Properties. *Mol. Cell* **12**: 101–111 Available at:  
923 <https://linkinghub.elsevier.com/retrieve/pii/S1097276503002430>
- 924 Kim PS & Arvan P (1993) Hormonal regulation of thyroglobulin export from the  
925 endoplasmic reticulum of cultured thyrocytes. *J. Biol. Chem.* **268**: 4873–9 Available  
926 at: <http://www.ncbi.nlm.nih.gov/pubmed/8095263>
- 927 Kim PS & Arvan P (1995) Calnexin and BiP act as sequential molecular chaperones  
928 during thyroglobulin folding in the endoplasmic reticulum. *J. Cell Biol.* **128**: 29–38  
929 Available at: [https://rupress.org/jcb/article/128/1/29/20227/Calnexin-and-BiP-act-as-](https://rupress.org/jcb/article/128/1/29/20227/Calnexin-and-BiP-act-as-sequential-molecular)  
930 [sequential-molecular](https://rupress.org/jcb/article/128/1/29/20227/Calnexin-and-BiP-act-as-sequential-molecular)
- 931 Kim PS, Hossain SA, Park Y-N, Lee I, Yoo S-E & Arvan P (1998) A single amino acid  
932 change in the acetylcholinesterase-like domain of thyroglobulin causes congenital  
933 goiter with hypothyroidism in the cog/cog mouse: A model of human endoplasmic  
934 reticulum storage diseases. *Proc. Natl. Acad. Sci.* **95**: 9909–9913 Available at:  
935 <http://www.pnas.org/cgi/doi/10.1073/pnas.95.17.9909>
- 936 Kim PS, Kim KR & Arvan P (1993) Disulfide-linked aggregation of thyroglobulin normally  
937 occurs during nascent protein folding. *Am. J. Physiol. Physiol.* **265**: C704–C711  
938 Available at: <https://www.physiology.org/doi/10.1152/ajpcell.1993.265.3.C704>
- 939 Kim PS, Kwon OY & Arvan P (1996) An endoplasmic reticulum storage disease causing  
940 congenital goiter with hypothyroidism. *J. Cell Biol.* **133**: 517–527 Available at:  
941 [https://rupress.org/jcb/article/133/3/517/15263/An-endoplasmic-reticulum-storage-](https://rupress.org/jcb/article/133/3/517/15263/An-endoplasmic-reticulum-storage-disease-causing)  
942 [disease-causing](https://rupress.org/jcb/article/133/3/517/15263/An-endoplasmic-reticulum-storage-disease-causing)
- 943 Kozlov G, Maattanen P, Schrag JD, Pollock S, Cygler M, Nagar B, Thomas DY &  
944 Gehring K (2006) Crystal Structure of the bb' Domains of the Protein Disulfide  
945 Isomerase ERp57. *Structure* **14**: 1331–1339 Available at:  
946 <https://linkinghub.elsevier.com/retrieve/pii/S0969212606003030>
- 947 Lamriben L, Graham JB, Adams BM & Hebert DN (2016) N -Glycan-based ER  
948 Molecular Chaperone and Protein Quality Control System: The Calnexin Binding  
949 Cycle. *Traffic* **17**: 308–326 Available at: <http://doi.wiley.com/10.1111/tra.12358>
- 950 Lee J, Di Jeso B & Arvan P (2008) The cholinesterase-like domain of thyroglobulin  
951 functions as an intramolecular chaperone. *J. Clin. Invest.* **118**: 2950–2958  
952 Available at: <http://www.jci.org/articles/view/35164>

- 953 Lee J, Di Jeso B & Arvan P (2011) Maturation of Thyroglobulin Protein Region I. *J. Biol.*  
954 *Chem.* **286**: 33045–33052 Available at:  
955 <http://www.jbc.org/lookup/doi/10.1074/jbc.M111.281337>
- 956 Lee J, Wang X, Di Jeso B & Arvan P (2009) The Cholinesterase-like Domain, Essential  
957 in Thyroglobulin Trafficking for Thyroid Hormone Synthesis, Is Required for Protein  
958 Dimerization. *J. Biol. Chem.* **284**: 12752–12761 Available at:  
959 <http://www.jbc.org/lookup/doi/10.1074/jbc.M806898200>
- 960 Martiniuk F, Ellenbogen A & Hirschhorn R (1985) Identity of neutral alpha-glucosidase  
961 AB and the glycoprotein processing enzyme glucosidase II. Biochemical and  
962 genetic studies. *J. Biol. Chem.* **260**: 1238–42 Available at:  
963 <http://www.ncbi.nlm.nih.gov/pubmed/3881423>
- 964 Menon S, Lee J, Abplanalp WA, Yoo S-E, Agui T, Furudate S, Kim PS & Arvan P (2007)  
965 Oxidoreductase Interactions Include a Role for ERp72 Engagement with Mutant  
966 Thyroglobulin from the rdw/rdw Rat Dwarf. *J. Biol. Chem.* **282**: 6183–6191  
967 Available at: <http://www.jbc.org/lookup/doi/10.1074/jbc.M608863200>
- 968 Molinari M, Calanca V, Galli C, Lucca P & Paganetti P (2003) Role of EDEM in the  
969 Release of Misfolded Glycoproteins from the Calnexin Cycle. *Science (80-. ).* **299**:  
970 1397–1400 Available at:  
971 <https://www.sciencemag.org/lookup/doi/10.1126/science.1079474>
- 972 Muresan Z & Arvan P (1997) Thyroglobulin Transport along the Secretory Pathway. *J.*  
973 *Biol. Chem.* **272**: 26095–26102 Available at:  
974 <http://www.jbc.org/lookup/doi/10.1074/jbc.272.42.26095>
- 975 Muresan Z & Arvan P (1998) Enhanced Binding to the Molecular Chaperone BiP Slows  
976 Thyroglobulin Export from the Endoplasmic Reticulum. *Mol. Endocrinol.* **12**: 458–  
977 467 Available at: [https://academic.oup.com/mend/article-](https://academic.oup.com/mend/article-lookup/doi/10.1210/mend.12.3.0069)  
978 [lookup/doi/10.1210/mend.12.3.0069](https://academic.oup.com/mend/article-lookup/doi/10.1210/mend.12.3.0069)
- 979 Nakatsukasa K, Brodsky JL & Kamura T (2013) A stalled retrotranslocation complex  
980 reveals physical linkage between substrate recognition and proteasomal  
981 degradation during ER-associated degradation. *Mol. Biol. Cell* **24**: 1765–1775  
982 Available at: <https://www.molbiolcell.org/doi/10.1091/mbc.e12-12-0907>
- 983 Oda Y, Hosokawa N, Wada I & Nagata K (2003) EDEM As an Acceptor of Terminally  
984 Misfolded Glycoproteins Released from Calnexin. *Science (80-. ).* **299**: 1394–1397  
985 Available at: <https://www.sciencemag.org/lookup/doi/10.1126/science.1079181>
- 986 Oetting A & Yen PM (2007) New insights into thyroid hormone action. *Best Pract. Res.*  
987 *Clin. Endocrinol. Metab.* **21**: 193–208 Available at:  
988 <https://linkinghub.elsevier.com/retrieve/pii/S1521690X07000346>
- 989 Oikonomou C & Hendershot LM (2020) Disposing of misfolded ER proteins: A troubled  
990 substrate's way out of the ER. *Mol. Cell. Endocrinol.* **500**: 110630
- 991 Olivieri A, Fazzini C & Medda E (2015) Multiple Factors Influencing the Incidence of  
992 Congenital Hypothyroidism Detected by Neonatal Screening. *Horm. Res. Paediatr.*  
993 **83**: 86–93 Available at: <https://www.karger.com/Article/FullText/369394>
- 994 Pankow S, Bamberger C, Calzolari D, Martínez-Bartolomé S, Lavallée-Adam M, Balch  
995 WE & Yates JR (2015)  $\Delta$ F508 CFTR interactome remodelling promotes rescue of  
996 cystic fibrosis. *Nature* **528**: 510–516 Available at:

- 997 <http://www.nature.com/articles/nature15729>
- 998 Pardo V, Rubio IGS, Knobel M, Aguiar-Oliveira MH, Santos MM, Gomes SA, Oliveira  
999 CRP, Targovnik HM & Medeiros-Neto G (2008) Phenotypic Variation Among Four  
1000 Family Members with Congenital Hypothyroidism Caused by Two Distinct  
1001 Thyroglobulin Gene Mutations. *Thyroid* **18**: 783–786 Available at:  
1002 <https://www.liebertpub.com/doi/10.1089/thy.2007.0321>
- 1003 Pardo V, Vono-Toniolo J, Rubio IGS, Knobel M, Possato RF, Targovnik HM, Kopp P &  
1004 Medeiros-Neto G (2009) The p.A2215D Thyroglobulin Gene Mutation Leads to  
1005 Deficient Synthesis and Secretion of the Mutated Protein and Congenital  
1006 Hypothyroidism with Wide Phenotype Variation. *J. Clin. Endocrinol. Metab.* **94**:  
1007 2938–2944 Available at: [https://academic.oup.com/jcem/article-](https://academic.oup.com/jcem/article-lookup/doi/10.1210/jc.2009-0150)  
1008 [lookup/doi/10.1210/jc.2009-0150](https://academic.oup.com/jcem/article-lookup/doi/10.1210/jc.2009-0150)
- 1009 Park Y & Arvan P (2004) The Acetylcholinesterase Homology Region Is Essential for  
1010 Normal Conformational Maturation and Secretion of Thyroglobulin. *J. Biol. Chem.*  
1011 **279**: 17085–17089 Available at:  
1012 <http://www.jbc.org/lookup/doi/10.1074/jbc.M314042200>
- 1013 Plate L, Cooley CB, Chen JJ, Paxman RJ, Gallagher CM, Madoux F, Genereux JC,  
1014 Dobbs W, Garza D, Spicer TP, Scampavia L, Brown SJ, Rosen H, Powers ET,  
1015 Walter P, Hodder P, Luke Wiseman R & Kelly JW (2016) Small molecule  
1016 proteostasis regulators that reprogram the ER to reduce extracellular protein  
1017 aggregation. *Elife* **5**:
- 1018 Plate L, Rius B, Nguyen B, Genereux JC, Kelly JW & Wiseman RL (2019) Quantitative  
1019 Interactome Proteomics Reveals a Molecular Basis for ATF6-Dependent  
1020 Regulation of a Destabilized Amyloidogenic Protein. *Cell Chem. Biol.* **26**: 913-  
1021 925.e4 Available at:  
1022 <https://linkinghub.elsevier.com/retrieve/pii/S2451945619301151>
- 1023 Plate L & Wiseman RL (2017) Regulating Secretory Proteostasis through the Unfolded  
1024 Protein Response: From Function to Therapy. *Trends Cell Biol.* **27**: 722–737  
1025 Available at: <https://linkinghub.elsevier.com/retrieve/pii/S0962892417300855>
- 1026 Pobre KFR, Poet GJ & Hendershot LM (2019) The endoplasmic reticulum (ER)  
1027 chaperone BiP is a master regulator of ER functions: Getting by with a little help  
1028 from ERdj friends. *J. Biol. Chem.* **294**: 2098–2108
- 1029 Pohl C & Dikic I (2019) Cellular quality control by the ubiquitin-proteasome system and  
1030 autophagy. *Science (80-. )*. **366**: 818–822 Available at:  
1031 <https://www.sciencemag.org/lookup/doi/10.1126/science.aax3769>
- 1032 Rose SR, Brown RS, Foley T, Kaplowitz PB, Kaye CI, Sundararajan S, Varma SK, Brink  
1033 SJ, Clarke WL, Silverstein J, Scales R, Laskosz L, Schaefer GB, Bull MJ, Enns  
1034 GM, Gruen JR, Hersh JH, Mendelsohn NJ, Saal HM, Goldberg JD, et al (2006)  
1035 Update of Newborn Screening and Therapy for Congenital Hypothyroidism.  
1036 *Pediatrics* **117**: 2290–2303 Available at:  
1037 <http://pediatrics.aappublications.org/cgi/doi/10.1542/peds.2006-0915>
- 1038 Ruiz-Canada C, Kelleher DJ & Gilmore R (2009) Cotranslational and Posttranslational  
1039 N-Glycosylation of Polypeptides by Distinct Mammalian OST Isoforms. *Cell* **136**:  
1040 272–283 Available at:

- 1041 <https://linkinghub.elsevier.com/retrieve/pii/S0092867408015626>
- 1042 Ryno LM, Genereux JC, Naito T, Morimoto RI, Powers ET, Shoulders MD & Wiseman  
1043 RL (2014) Characterizing the Altered Cellular Proteome Induced by the Stress-  
1044 Independent Activation of Heat Shock Factor 1. *ACS Chem. Biol.* **9**: 1273–1283  
1045 Available at: <https://pubs.acs.org/doi/10.1021/cb500062n>
- 1046 Schuck S, Gallagher CM & Walter P (2014) ER-phagy mediates selective degradation  
1047 of endoplasmic reticulum independently of the core autophagy machinery. *J. Cell*  
1048 *Sci.* **127**: 4078–4088 Available at:  
1049 <http://jcs.biologists.org/cgi/doi/10.1242/jcs.154716>
- 1050 Shoulders MD, Ryno LM, Genereux JC, Moresco JJ, Tu PG, Wu C, Yates JR, Su AI,  
1051 Kelly JW & Wiseman RL (2013) Stress-Independent Activation of XBP1s and/or  
1052 ATF6 Reveals Three Functionally Diverse ER Proteostasis Environments. *Cell*  
1053 *Rep.* **3**: 1279–1292 Available at:  
1054 <https://linkinghub.elsevier.com/retrieve/pii/S2211124713001319>
- 1055 Storey JD & Tibshirani R (2003) Statistical significance for genomewide studies. *Proc.*  
1056 *Natl. Acad. Sci. U. S. A.*
- 1057 Sun Z & Brodsky JL (2018) The degradation pathway of a model misfolded protein is  
1058 determined by aggregation propensity. *Mol. Biol. Cell* **29**: 1422–1434 Available at:  
1059 <https://www.molbiolcell.org/doi/10.1091/mbc.E18-02-0117>
- 1060 Sun Z & Brodsky JL (2019) Protein quality control in the secretory pathway. *J. Cell Biol.*  
1061 **218**: 3171–3187
- 1062 Taipale M, Tucker G, Peng J, Krykbaeva I, Lin Z-Y, Larsen B, Choi H, Berger B,  
1063 Gingras A-C & Lindquist S (2014) A Quantitative Chaperone Interaction Network  
1064 Reveals the Architecture of Cellular Protein Homeostasis Pathways. *Cell* **158**: 434–  
1065 448 Available at: <https://linkinghub.elsevier.com/retrieve/pii/S0092867414007405>
- 1066 Tang H-Y, Huang C-H, Zhuang Y-H, Christianson JC & Chen X (2014) EDEM2 and OS-  
1067 9 Are Required for ER-Associated Degradation of Non-Glycosylated Sonic  
1068 Hedgehog. *PLoS One* **9**: e92164 Available at:  
1069 <http://dx.plos.org/10.1371/journal.pone.0092164> [Accessed April 6, 2020]
- 1070 Tokunaga F, Brostrom C, Koide T & Arvan P (2000) Endoplasmic Reticulum (ER)-  
1071 associated Degradation of Misfolded N -Linked Glycoproteins Is Suppressed upon  
1072 Inhibition of ER Mannosidase I. *J. Biol. Chem.* **275**: 40757–40764 Available at:  
1073 <http://www.jbc.org/lookup/doi/10.1074/jbc.M001073200>
- 1074
- 1075
